# Supplementary material for: Expanding Extender Substrate Selection for Unnatural Polyketide Biosynthesis by Acyltransferase Domain Exchange within a Modular Polyketide Synthase
Source: PubMed Central journal article supplement — J Am Chem Soc. 2023 Apr 14;145(16):8822–32. doi: 10.1021/jacs.2c11027 (PMC10141241; doi:10.1021/jacs.2c11027), 2023-04-14
Supplement: ja2c11027_si_002.pdf [file ja2c11027_si_002.pdf]

## Supporting Information

### Expanding extender substrate selection for unnatural polyketide biosynthesis by acyltransferase domain exchange within a modular polyketide synthase

Elias Englund<sup>1,12</sup>, Matthias Schmidt<sup>1,2,13</sup>, Alberto A. Nava<sup>2,5</sup>, Anna Lechner<sup>5,6</sup>, Kai Deng<sup>1,9</sup>, Renee Jovic<sup>1,2</sup>, Yingxin Lin<sup>7</sup>, Jacob Roberts<sup>2,6</sup>, Veronica T. Benites<sup>1,2</sup>, Ramu Kakumanu<sup>1,2</sup>, Jennifer W. Gin<sup>1,2</sup>, Yan Chen<sup>1,2</sup>, Yuzhong Liu<sup>5,6</sup>, Christopher J. Petzold<sup>1,2</sup>, Edward E. K. Baidoo<sup>1,2</sup>, Trent R. Northen<sup>1,3</sup>, Paul D. Adams<sup>1,4,6</sup>, Leonard Katz<sup>1,8</sup>, Satoshi Yuzawa<sup>1,2,14,15\*</sup>, and Jay D. Keasling<sup>1,2,5,6,8-11\*</sup>

<sup>1</sup>Joint BioEnergy Institute, Emeryville, CA 94608, USA.

<sup>2</sup>Biological Systems and Engineering Division, Lawrence Berkeley National Laboratory, Berkeley, CA 94720, USA.

<sup>3</sup>Environmental Genomics and Systems Biology Division, Lawrence Berkeley National Laboratory, Berkeley, CA 94720, USA.

<sup>4</sup>Molecular Biophysics and Integrated Bioimaging Division, Lawrence Berkeley National Laboratory, Berkeley, CA 94720, USA.

<sup>5</sup>Department of Chemical and Biomolecular Engineering, University of California, Berkeley, CA 94720, USA.

<sup>6</sup>Department of Bioengineering, University of California, Berkeley, CA 94720, USA.

<sup>7</sup>Department of Molecular and Cell Biology, University of California, Berkeley, CA 94720, USA.

<sup>8</sup>QB3 Institute, University of California, Berkeley, CA 94720, USA.

<sup>9</sup>Department of Biomaterials and Biomanufacturing, Sandia National Laboratory, Livermore, CA 94550, USA.

<sup>10</sup>Novo Nordisk Foundation Center for Biosustainability, Technical University of Denmark, Kongens Lyngby 2800, Denmark.

<sup>11</sup>Center for Synthetic Biochemistry, Shenzhen Institutes of Advanced Technologies, Shenzhen, Guangdong 518055, China.

<sup>12</sup>Science for Life Laboratory, KTH - Royal Institute of Technology, 17165, Stockholm, Sweden.

<sup>13</sup>Institute of Applied Microbiology, Aachen Biology and Biotechnology, RWTH Aachen University, 52704 Aachen, Germany.

<sup>14</sup>Systems Biology Program, Graduate School of Media and Governance, Keio University, Fujisawa, Kanagawa 252-0882, Japan.

<sup>15</sup>Institute of Advanced Biosciences, Keio University, Tsuruoka, Yamagata 997-0017, Japan.

\*Corresponding authors

**Satoshi Yuzawa** – Email: [syuzawa@ttck.keio.ac.jp](mailto:syuzawa@ttck.keio.ac.jp)

**Jay D. Keasling** – Email: [keasling@berkeley.edu](mailto:keasling@berkeley.edu)

#### Table of Contents

|                                                                                                                     |   |
|---------------------------------------------------------------------------------------------------------------------|---|
| 1. Supplementary figures .....                                                                                      | 3 |
| S1 SDS-PAGE analysis of purified AT-exchanged mutants and MatB T207G/M306I                                          |   |
| S2 <i>In vitro</i> production of extender substrates by MatB T207G/M306I from the corresponding diacids             |   |
| S3 <i>In vitro</i> production of polyketide <b>14</b> by Epo-4                                                      |   |
| S4 <i>In vitro</i> production of polyketides <b>15</b> and <b>16</b>                                                |   |
| S5 Substrate structure preference of ATs used in this study                                                         |   |
| S6 <i>In vitro</i> production of polyketides <b>17</b> and <b>18</b> by Ans-8                                       |   |
| S7 <i>In vitro</i> production of polyketides <b>7</b> , <b>8</b> , <b>13</b> and <b>18</b> with authentic standards |   |
| S8 A comparison between existing and our computational models                                                       |   |

|                                                                                                                          |    |
|--------------------------------------------------------------------------------------------------------------------------|----|
| S9 Analysis of the active site shape for 6000+ ATs with and without substrate annotations                                |    |
| S10 Production of polyketides <b>2</b> , <b>7</b> , <b>8</b> , <b>13</b> , and <b>14</b> by KS-mutated AT-exchanged PKSs |    |
| 2. Supplementary tables .....                                                                                            | 19 |
| S1 Amino acid sequences of DEBS M6+TE and the AT exchanged mutants                                                       |    |
| S2 Plasmids and strains used in this study                                                                               |    |
| S3 Polyketide production by Epo-4 relative to WT                                                                         |    |
| S4 Polyketide production by Mon-5 relative to WT                                                                         |    |
| S5 Polyketide production by Nid-5 relative to WT                                                                         |    |
| S6 Polyketide production by Rev-4 relative to WT                                                                         |    |
| S7 Polyketide production by Div-4 relative to WT                                                                         |    |
| S8 Polyketide production by Ans-8 relative to WT                                                                         |    |
| S9 Polyketide production by San-13 relative to WT                                                                        |    |
| S10 Polyketide production by Leu-2 relative to WT                                                                        |    |
| S11 Polyketide production by Div-6 relative to WT                                                                        |    |
| S12 Polyketide production by Sal-1 relative to WT                                                                        |    |
| S13 Polyketide production by Sta-12 relative to WT                                                                       |    |
| S14 Polyketide production by Spl-3 relative to WT                                                                        |    |
| S15 Amino acid sequences that are predicted to form AT active sites                                                      |    |
| 3. Supplementary methods .....                                                                                           | 43 |
| 4. Supplementary references .....                                                                                        | 44 |

## 1. Supplementary figures

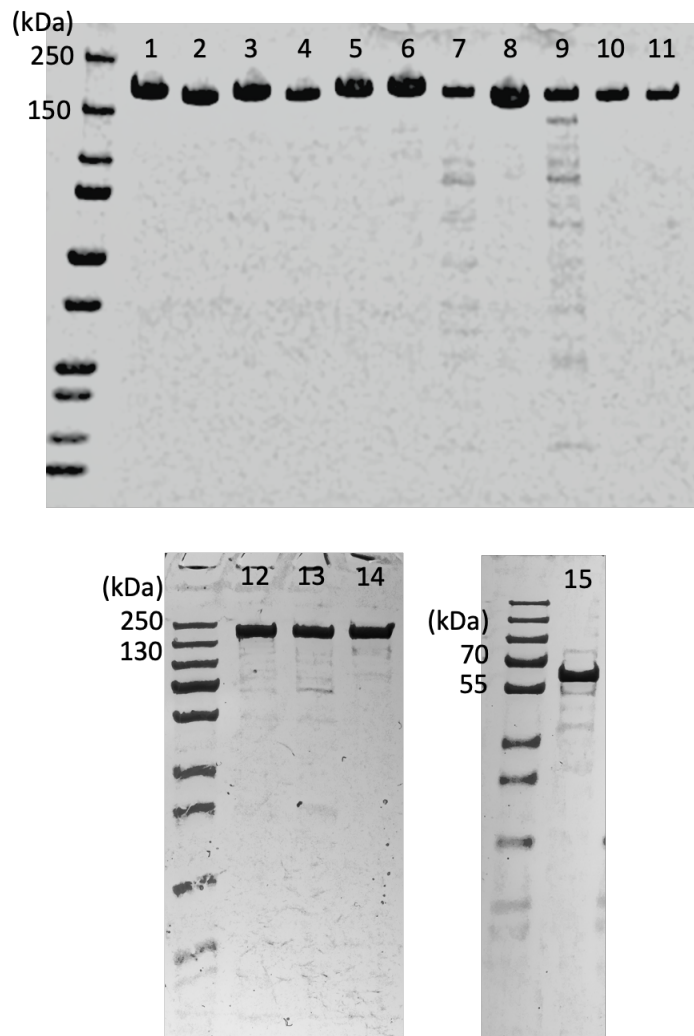

**Figure S1.** SDS-PAGE analysis of purified AT-exchanged mutants and MatB T207G/M306I. Nid-5 (lane 1); Ans-8 (lane 2); San-13 (lane 3); Leu-2 (lane 4); Div-6 (lane 5); Div-4 (lane 6); Sal-1 (lane 7); Mon-5 (lane 8); Sta-12 (lane 9); Rev-4 (lane 10); Spl-3 (lane 11); WT A162W (lane 12); Epo-4 A162W (lane 13); Rev-4 A162W (lane 14); MatB T207G/M306I (lane 15).

(a)

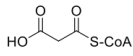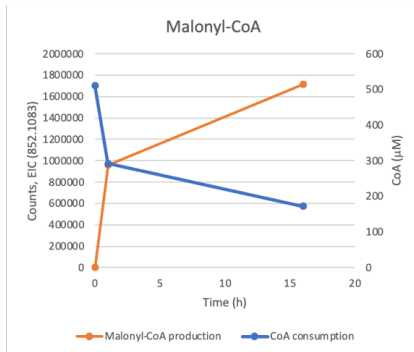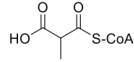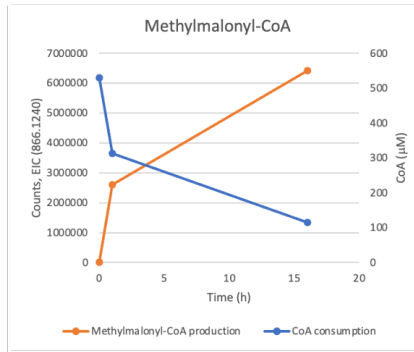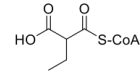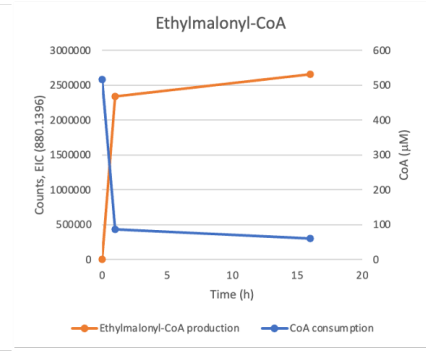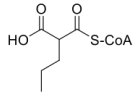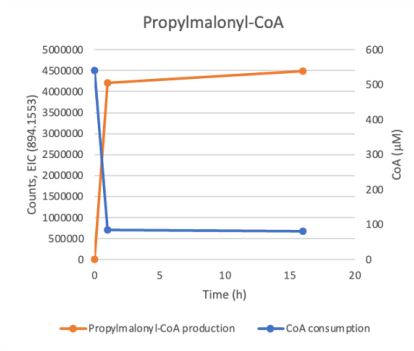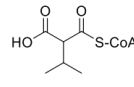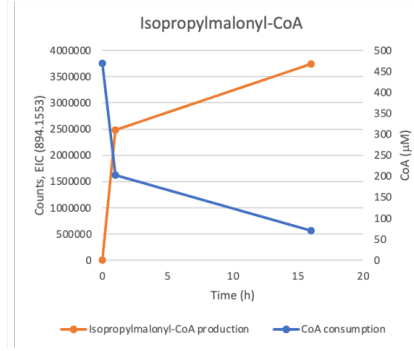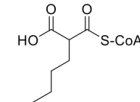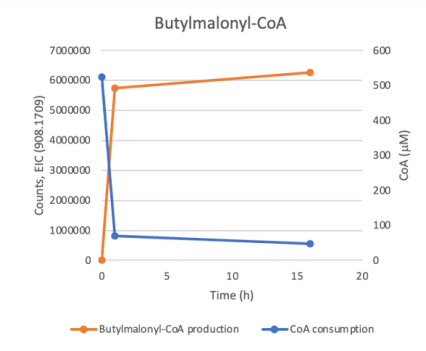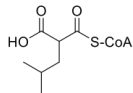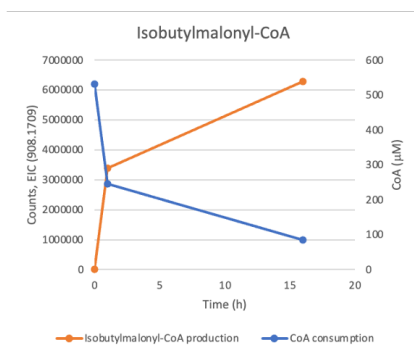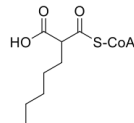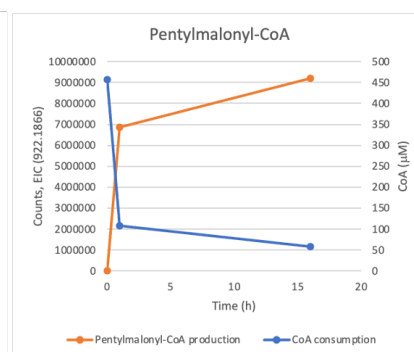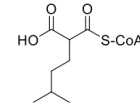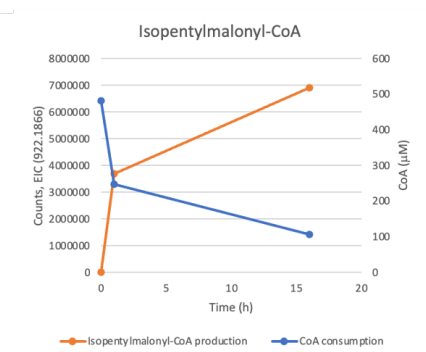

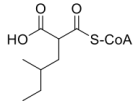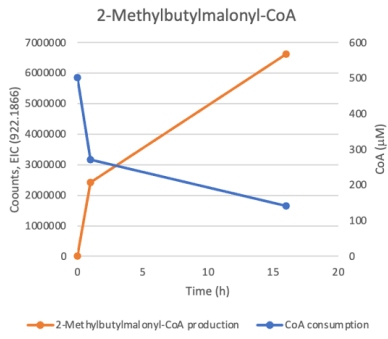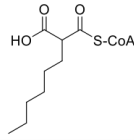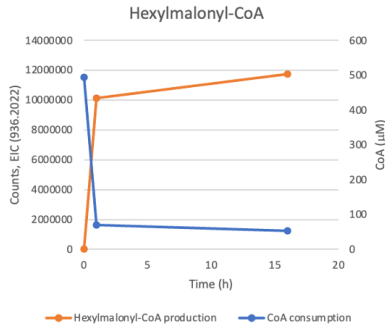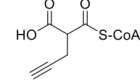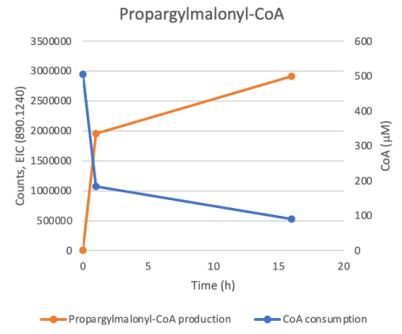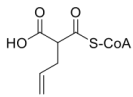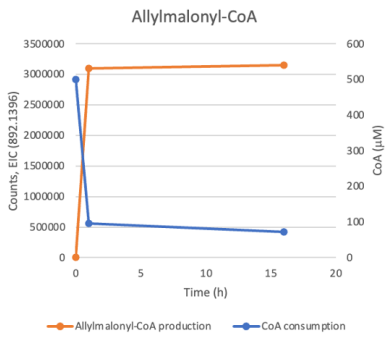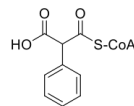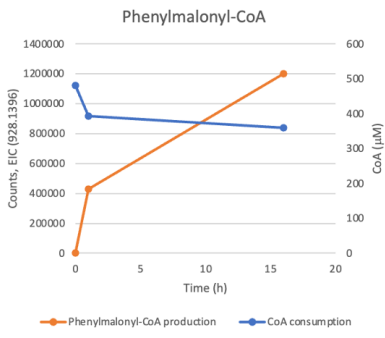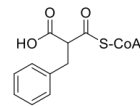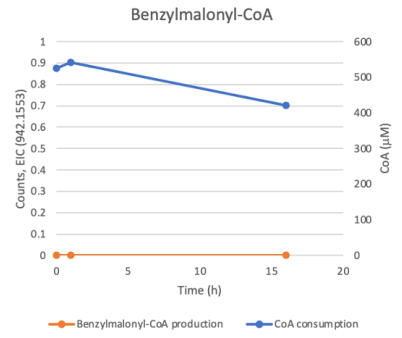

(b)

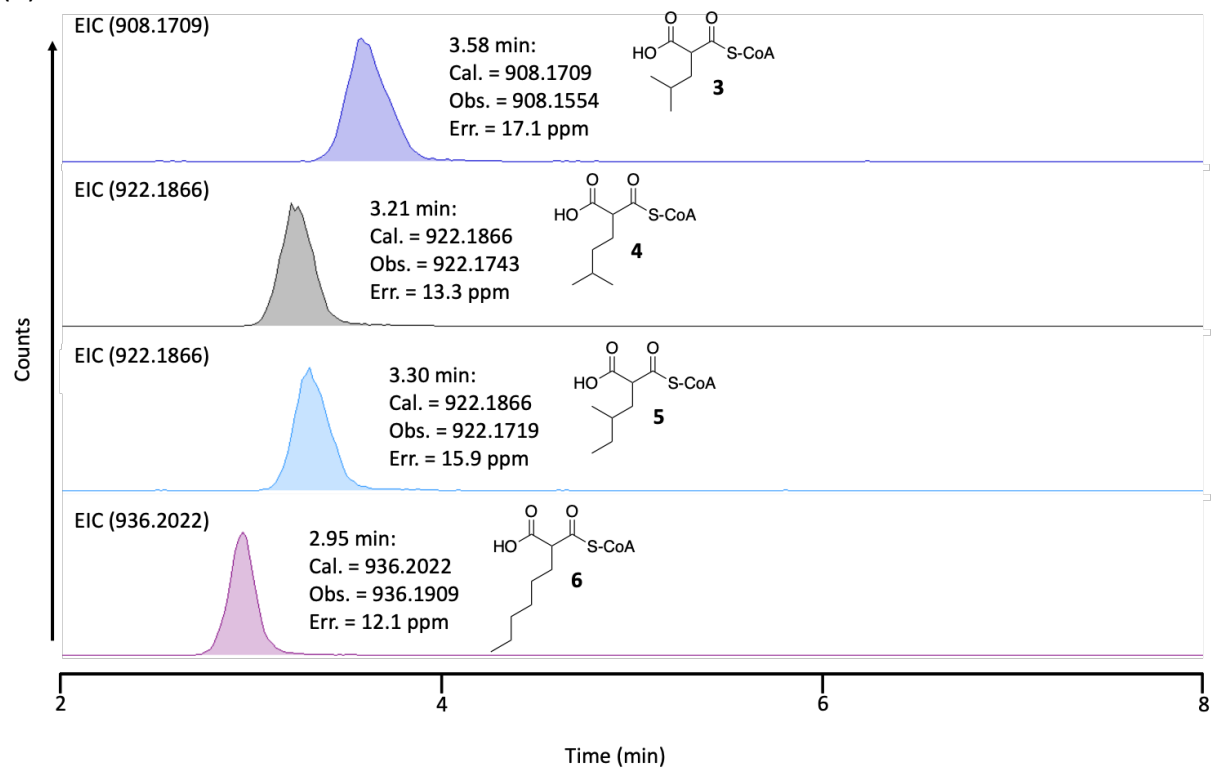

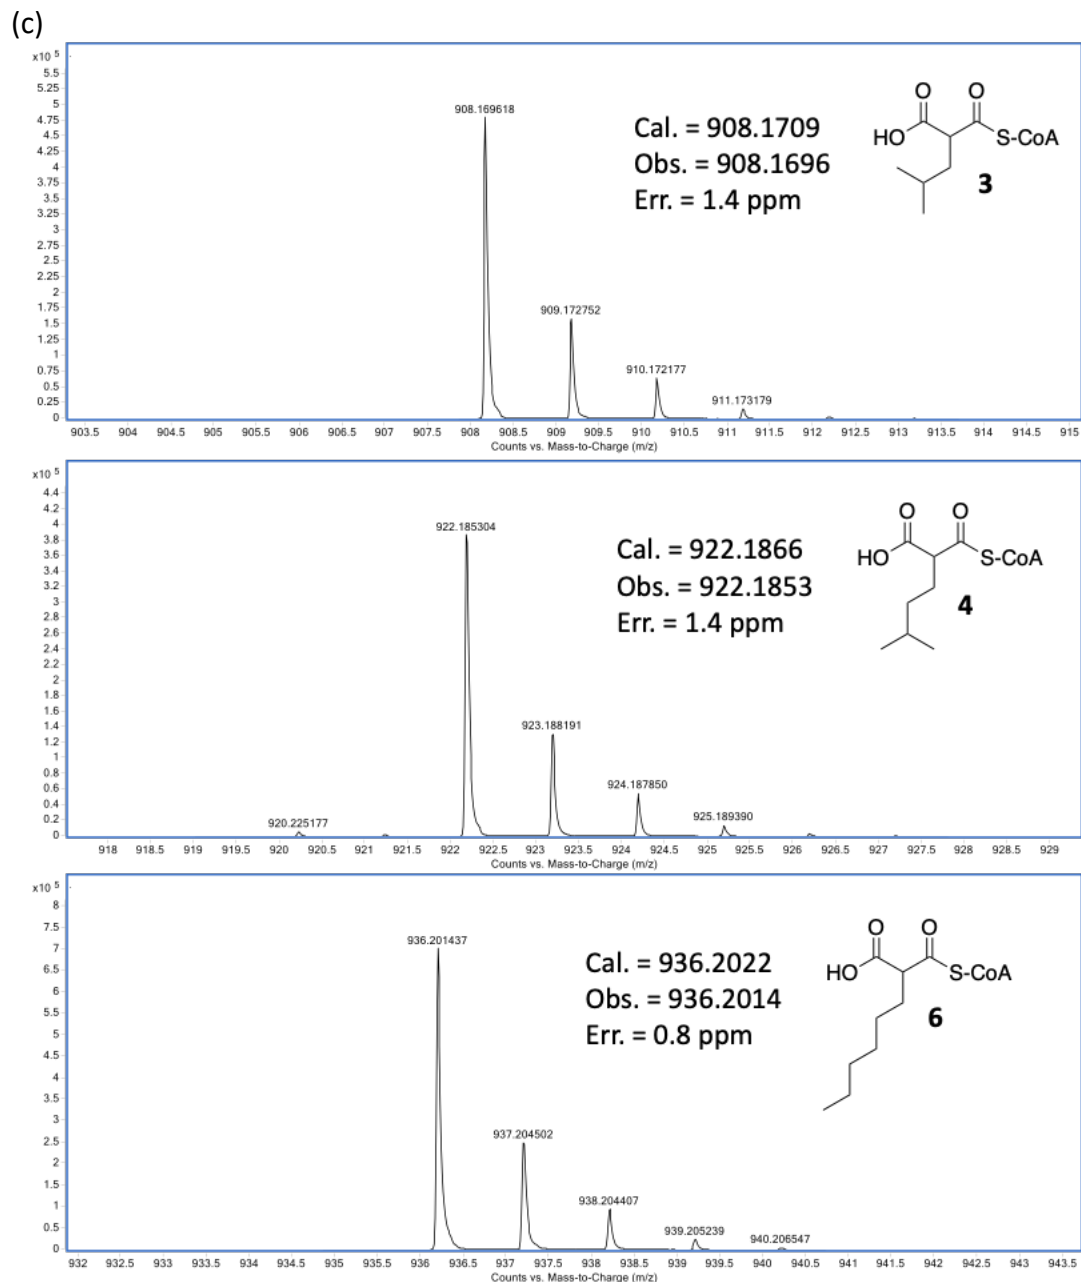

**Figure S2.** *In vitro* production of extender substrates by MatB T207G/M306I from the corresponding diacids. (a) Substrate production and CoA consumption were monitored by LC-TOF-MS. (b) Extracted ion chromatograms (EIC) of  $\alpha$ -carboxyacyl-CoAs **3-6** produced *in vitro*. (c) LC-TOF-MS analysis of  $\alpha$ -carboxyacyl-CoAs **3**, **4** and **6** was performed using a different method we described previously<sup>1</sup>. For  $\alpha$ -carboxyacyl-CoA **5**, we could not evaluate the mass accuracy due to unavailability of dimethyl(2-methylbutyl)malonate.

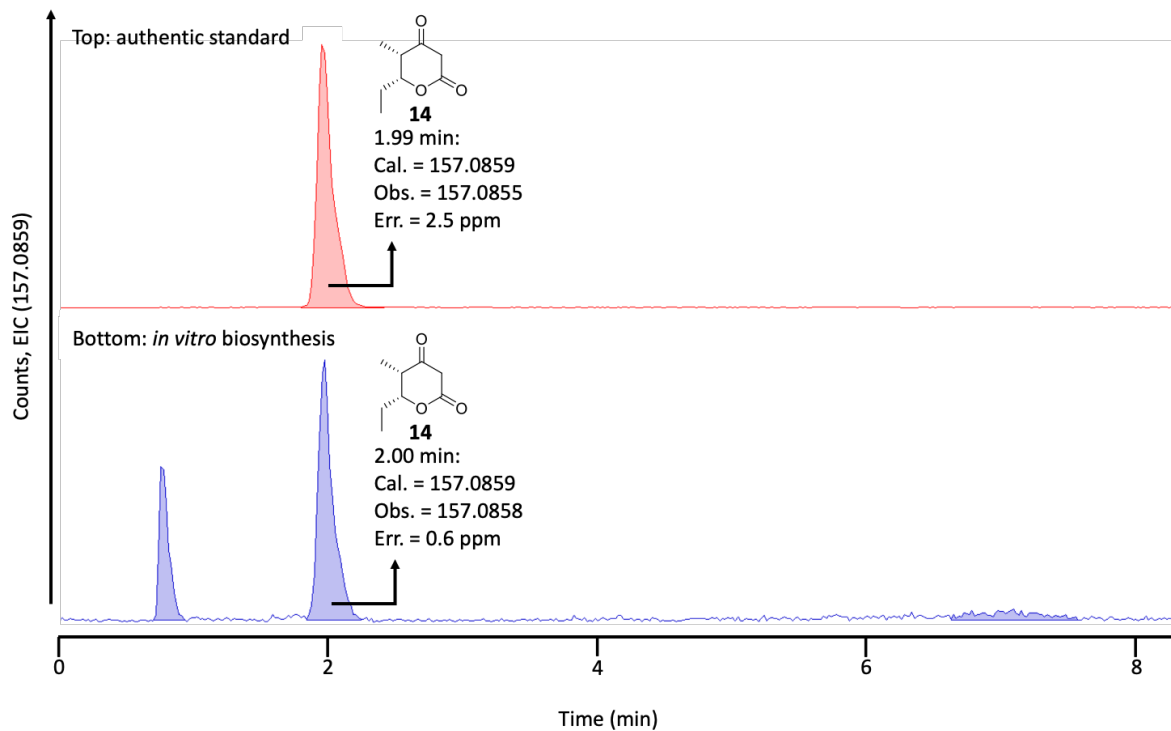

**Figure S3.** *In vitro* production of polyketide **14** by Epo-4. Extracted ion chromatograms (EIC) of an authentic standard of **14** (top) and an extract from the *in vitro* reaction (bottom). The observed mass errors were within 5 ppm.



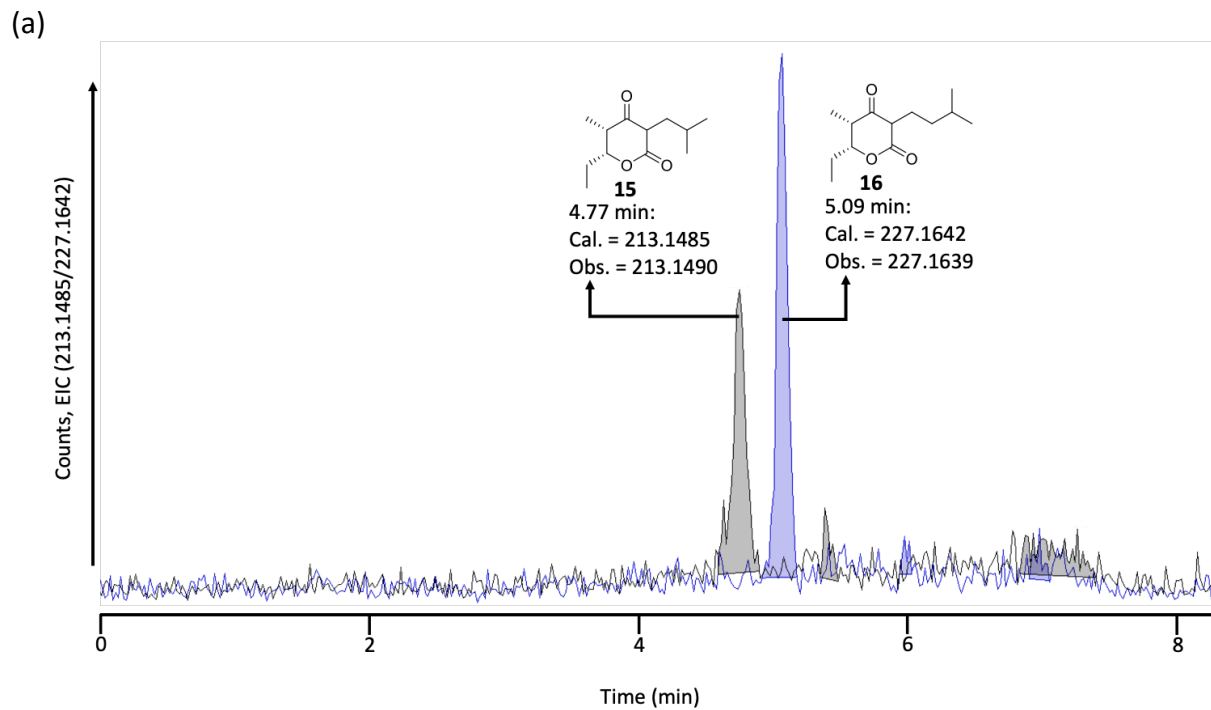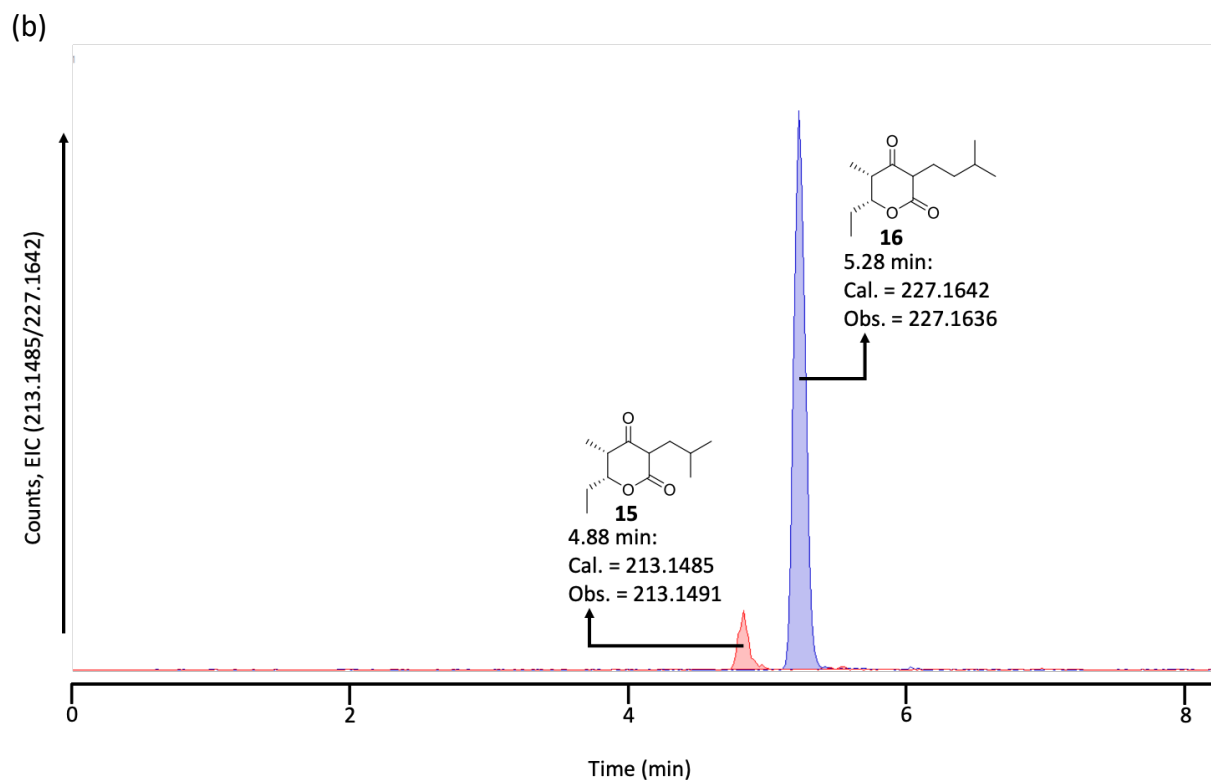

**Figure S4.** *In vitro* production of polyketides **15** and **16**. (a) Production of polyketides **15** and **16** by Epo-4. Extracted ion chromatograms (EIC) of extracts from the corresponding *in vitro* reactions were overlaid. Observed mass errors for producing **15** and **16** are 2.4 ppm and 1.3 ppm,

respectively. (b) Production of polyketides **15** and **16** by Leu-2. Extracted ion chromatograms (EIC) of extracts from the corresponding *in vitro* reactions were overlaid. Observed mass errors for producing **15** and **16** are 2.8 ppm and 2.6 ppm, respectively.

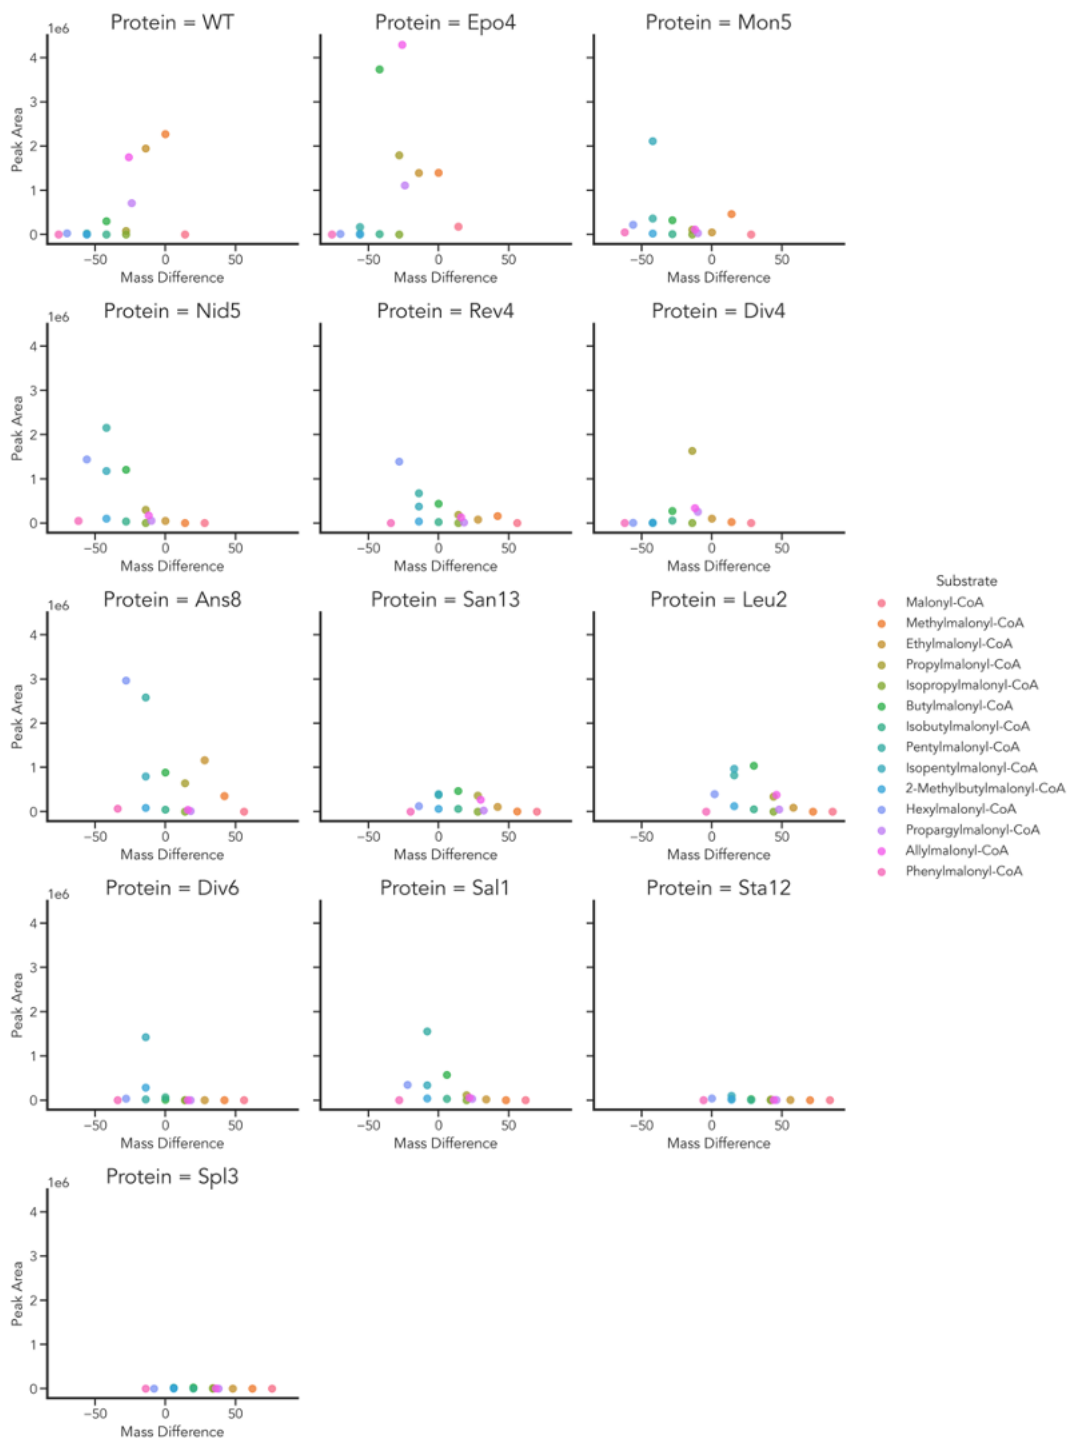

**Figure S5.** Substrate structure preference of ATs used in this study. A positive mass difference means that the substrate tested was smaller than the native substrate. A negative mass difference means that the substrate tested was larger than the native substrate. For Rev-4 and Sta-12, we employed butylmalonyl-CoA and hexylmalonyl-CoA as native substrates, respectively.

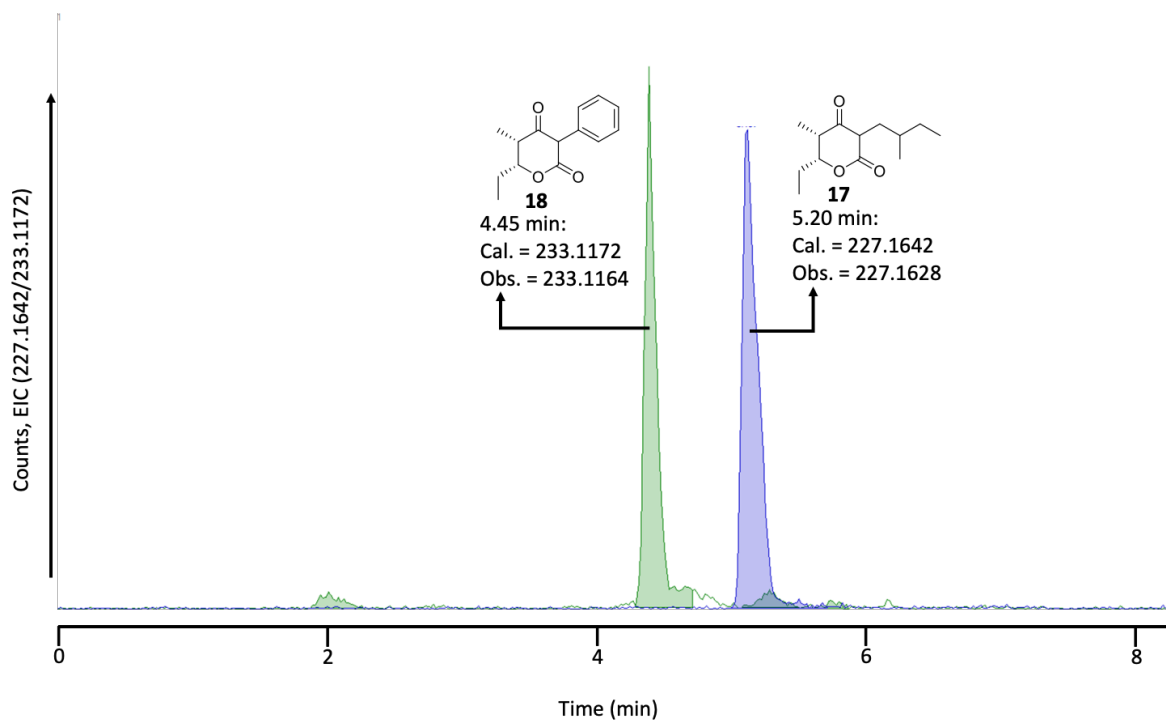

**Figure S6.** *In vitro* production of polyketides **17** and **18** by Ans-8. Extracted ion chromatograms (EIC) of extracts from the corresponding *in vitro* reactions were overlaid. Observed mass errors for producing **17** and **18** are 2.6 ppm and 3.4 ppm, respectively.

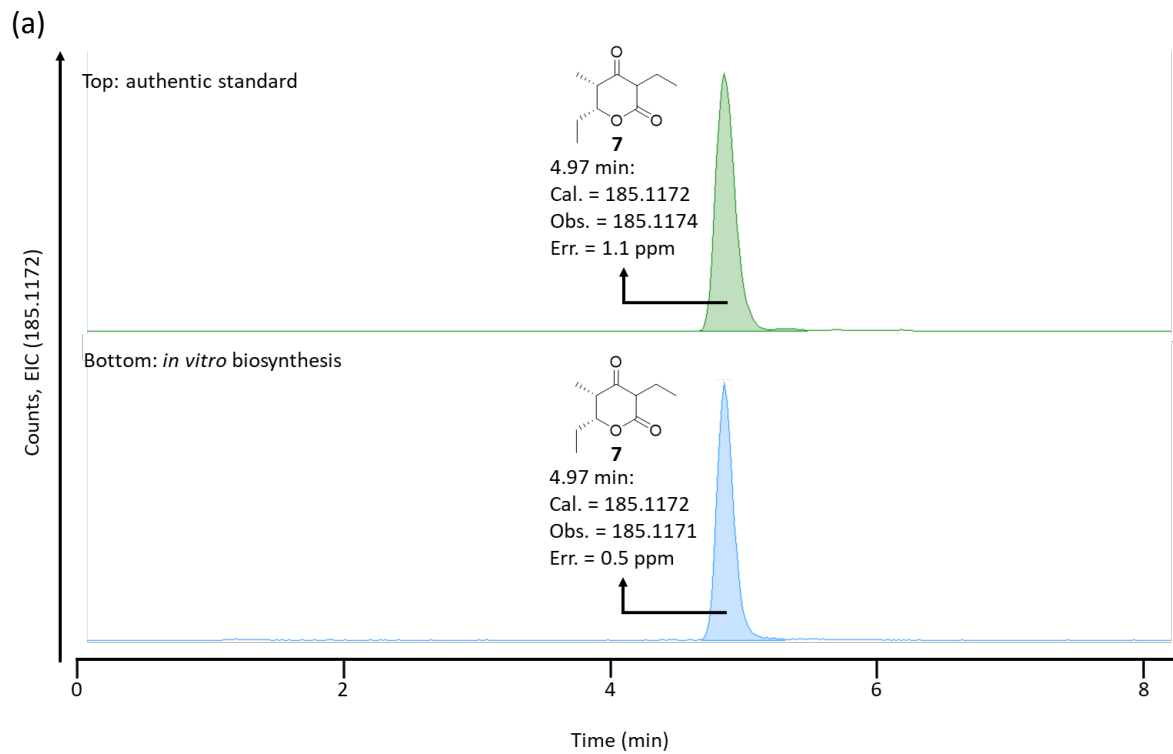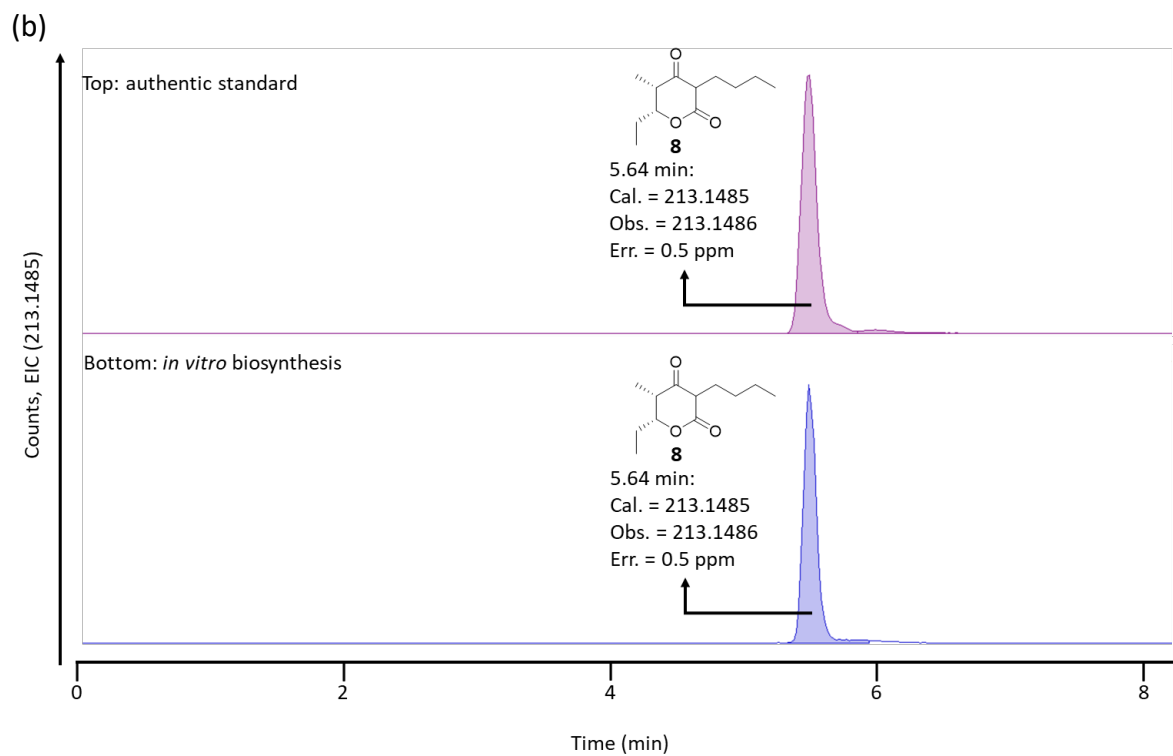

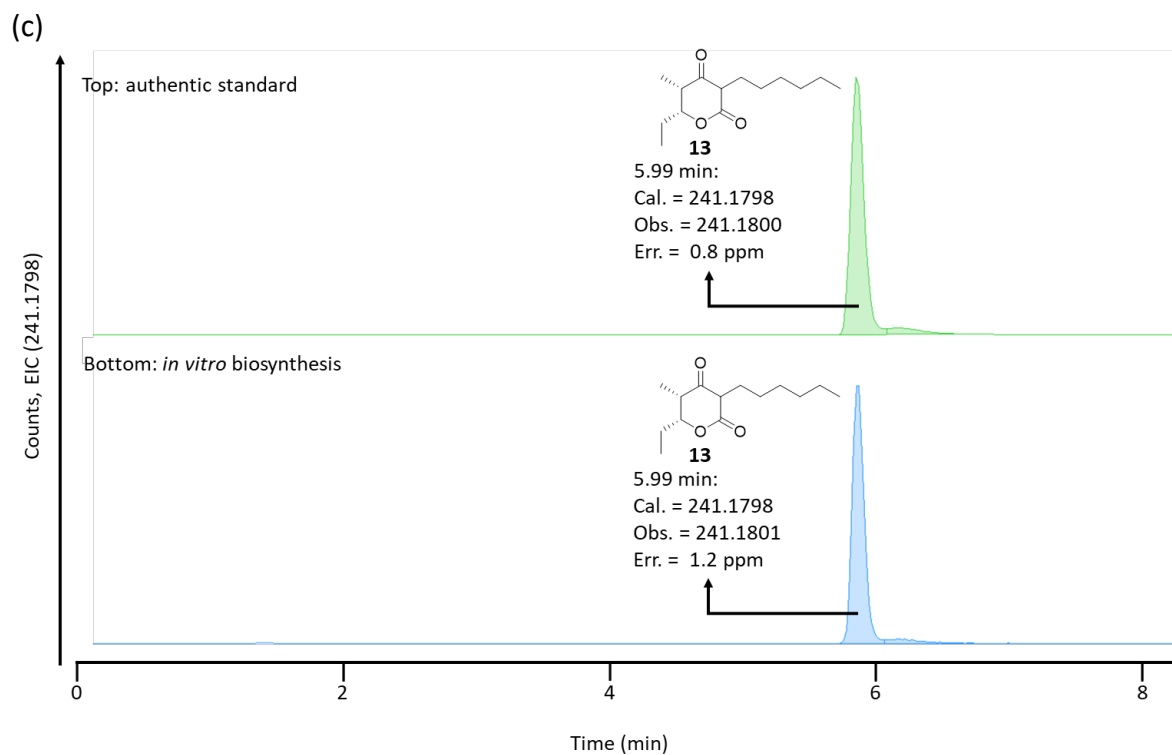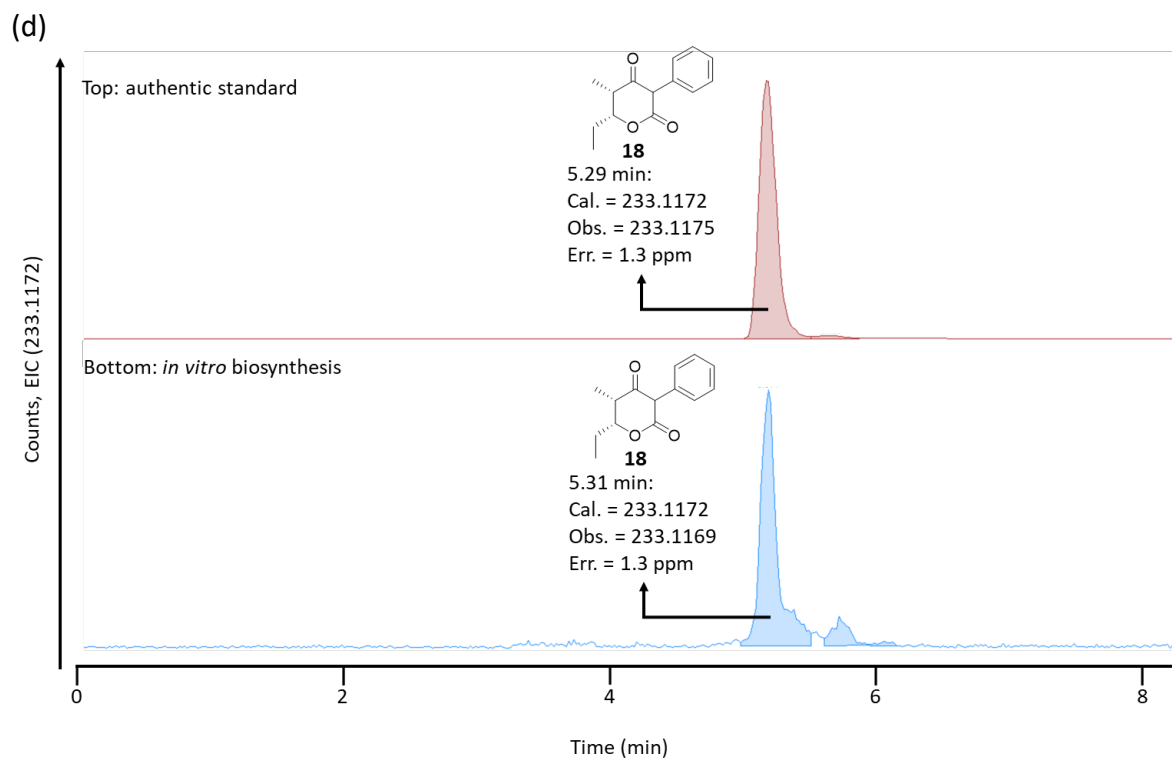

**Figure S7.** *In vitro* production of polyketides **7**, **8**, **13** and **18** with authentic standards. (A) *In vitro* production of polyketides **7** by Epo-4. Extracted ion chromatograms (EIC) of an authentic standard of **7** (top) and an extract from the *in vitro* reaction (bottom). (B) *In vitro* production of

polyketides **8** by Epo-4. EIC of an authentic standard of **8** (top) and an extract from the *in vitro* reaction (bottom). (C) *In vitro* production of polyketides **13** by Rev-4. EIC of an authentic standard of **13** (top) and an extract from the *in vitro* reaction (bottom). (D) *In vitro* production of polyketides **18** by Nid-5. EIC of an authentic standard of **18** (top) and an extract from the *in vitro* reaction (bottom). The observed mass errors were within 5 ppm.

(a)

|                           | Accuracy | F1 score |
|---------------------------|----------|----------|
| Yadav model <sup>2</sup>  | 96.6%    | 0.974    |
| Minowa model <sup>3</sup> | 93.3%    | 0.932    |
| Our model on testing set  | 97.2%    | 0.970    |

(b)

| Yadav model <sup>2</sup> |                               |     |     |    |   |   |   |   |   | Minowa model <sup>3</sup> |            |                               |     |     |    |   |   |   |   |   |   |   |   |
|--------------------------|-------------------------------|-----|-----|----|---|---|---|---|---|---------------------------|------------|-------------------------------|-----|-----|----|---|---|---|---|---|---|---|---|
| True label               | Methylmalonyl-CoA             | 429 | 1   | 0  | 0 | 0 | 0 | 0 | 0 | 0                         | True label | Methylmalonyl-CoA             | 398 | 1   | 33 | 0 | 0 | 0 | 0 | 0 | 0 | 0 |   |
|                          | Malonyl-CoA                   | 2   | 554 | 0  | 0 | 0 | 0 | 0 | 0 | 0                         |            | 0                             | 14  | 557 | 0  | 0 | 0 | 0 | 0 | 0 | 0 | 0 |   |
|                          | Ethylmalonyl-CoA              | 1   | 0   | 26 | 0 | 0 | 0 | 0 | 0 | 0                         |            | 0                             | 13  | 0   | 16 | 0 | 0 | 0 | 0 | 0 | 0 | 0 | 0 |
|                          | 1-hydroxyisopentylmalonyl-CoA | 0   | 1   | 0  | 0 | 0 | 0 | 0 | 0 | 0                         |            | 0                             | 0   | 1   | 0  | 0 | 0 | 0 | 0 | 0 | 0 | 0 | 0 |
|                          | Isobutylmalonyl-CoA           | 0   | 0   | 0  | 0 | 0 | 0 | 0 | 0 | 0                         |            | 0                             | 0   | 1   | 0  | 0 | 0 | 0 | 0 | 0 | 0 | 0 | 0 |
|                          | BenzyImalonyl-CoA             | 0   | 1   | 0  | 0 | 0 | 0 | 0 | 0 | 0                         |            | 0                             | 0   | 1   | 0  | 0 | 0 | 0 | 0 | 0 | 0 | 0 | 0 |
|                          | 2-chloroethylmalonyl-CoA      | 0   | 0   | 0  | 0 | 0 | 0 | 0 | 0 | 0                         |            | 0                             | 0   | 1   | 0  | 0 | 0 | 0 | 0 | 0 | 0 | 0 | 0 |
|                          | Hexylmalonyl-CoA              | 0   | 0   | 1  | 0 | 0 | 0 | 0 | 0 | 0                         |            | 0                             | 1   | 0   | 1  | 0 | 0 | 0 | 0 | 0 | 0 | 0 | 0 |
|                          | Butylmalonyl-CoA              | 0   | 0   | 2  | 0 | 0 | 0 | 0 | 0 | 0                         |            | 0                             | 2   | 0   | 0  | 0 | 0 | 0 | 0 | 0 | 0 | 0 | 0 |
|                          | 3-oxobutylmalonyl-CoA         | 0   | 0   | 0  | 0 | 0 | 0 | 0 | 0 | 0                         |            | 0                             | 0   | 0   | 0  | 1 | 0 | 0 | 0 | 0 | 0 | 0 | 0 |
|                          | Methylmalonyl-CoA             |     |     |    |   |   |   |   |   |                           |            | Methylmalonyl-CoA             |     |     |    |   |   |   |   |   |   |   |   |
|                          | Malonyl-CoA                   |     |     |    |   |   |   |   |   |                           |            | Malonyl-CoA                   |     |     |    |   |   |   |   |   |   |   |   |
|                          | Ethylmalonyl-CoA              |     |     |    |   |   |   |   |   |                           |            | Ethylmalonyl-CoA              |     |     |    |   |   |   |   |   |   |   |   |
|                          | 1-hydroxyisopentylmalonyl-CoA |     |     |    |   |   |   |   |   |                           |            | 1-hydroxyisopentylmalonyl-CoA |     |     |    |   |   |   |   |   |   |   |   |
|                          | Isobutylmalonyl-CoA           |     |     |    |   |   |   |   |   |                           |            | Isobutylmalonyl-CoA           |     |     |    |   |   |   |   |   |   |   |   |
|                          | BenzyImalonyl-CoA             |     |     |    |   |   |   |   |   |                           |            | BenzyImalonyl-CoA             |     |     |    |   |   |   |   |   |   |   |   |
|                          | 2-chloroethylmalonyl-CoA      |     |     |    |   |   |   |   |   |                           |            | 2-chloroethylmalonyl-CoA      |     |     |    |   |   |   |   |   |   |   |   |
|                          | Hexylmalonyl-CoA              |     |     |    |   |   |   |   |   |                           |            | Hexylmalonyl-CoA              |     |     |    |   |   |   |   |   |   |   |   |
|                          | Butylmalonyl-CoA              |     |     |    |   |   |   |   |   |                           |            | Butylmalonyl-CoA              |     |     |    |   |   |   |   |   |   |   |   |
|                          | 3-oxobutylmalonyl-CoA         |     |     |    |   |   |   |   |   |                           |            | 3-oxobutylmalonyl-CoA         |     |     |    |   |   |   |   |   |   |   |   |
|                          | Predicted label               |     |     |    |   |   |   |   |   |                           |            | Predicted label               |     |     |    |   |   |   |   |   |   |   |   |
| Our model                |                               |     |     |    |   |   |   |   |   |                           |            |                               |     |     |    |   |   |   |   |   |   |   |   |
| True label               | Methylmalonyl-CoA             | 85  | 2   | 0  | 0 | 0 | 0 | 0 | 0 | 0                         | True label | Methylmalonyl-CoA             | 0   | 113 | 0  | 0 | 0 | 0 | 0 | 0 | 0 | 0 |   |
|                          | Malonyl-CoA                   | 0   | 0   | 2  | 0 | 0 | 0 | 0 | 0 | 0                         |            | 0                             | 0   | 0   | 1  | 0 | 0 | 0 | 0 | 0 | 0 | 0 |   |
|                          | Hexylmalonyl-CoA              | 0   | 0   | 0  | 1 | 0 | 0 | 0 | 0 | 0                         |            | 0                             | 0   | 0   | 0  | 0 | 0 | 0 | 0 | 0 | 0 | 0 |   |
|                          | 3-oxobutylmalonyl-CoA         | 0   | 0   | 0  | 0 | 1 | 0 | 0 | 0 | 0                         |            | 0                             | 0   | 0   | 0  | 0 | 0 | 0 | 0 | 0 | 0 | 0 |   |
|                          | Ethylmalonyl-CoA              | 1   | 0   | 0  | 0 | 0 | 0 | 0 | 0 | 0                         |            | 0                             | 0   | 0   | 0  | 0 | 0 | 0 | 0 | 0 | 0 | 0 |   |
|                          | BenzyImalonyl-CoA             | 0   | 0   | 0  | 0 | 0 | 0 | 0 | 0 | 0                         |            | 0                             | 0   | 0   | 0  | 0 | 0 | 0 | 0 | 0 | 0 | 0 |   |
|                          | Isobutylmalonyl-CoA           | 0   | 0   | 0  | 0 | 0 | 0 | 0 | 0 | 0                         |            | 0                             | 0   | 0   | 0  | 0 | 0 | 0 | 0 | 0 | 0 | 0 |   |
|                          | Butylmalonyl-CoA              | 1   | 0   | 0  | 0 | 0 | 0 | 0 | 0 | 0                         |            | 0                             | 1   | 0   | 0  | 0 | 0 | 0 | 0 | 0 | 0 | 0 |   |
|                          | 1-hydroxyisopentylmalonyl-CoA | 0   | 0   | 0  | 0 | 0 | 1 | 0 | 0 | 0                         |            | 0                             | 0   | 0   | 0  | 0 | 1 | 0 | 0 | 0 | 0 | 0 |   |
|                          | 2-chloroethylmalonyl-CoA      | 0   | 0   | 0  | 0 | 0 | 0 | 0 | 0 | 0                         |            | 0                             | 0   | 0   | 0  | 0 | 0 | 0 | 0 | 0 | 1 | 0 |   |
|                          | Methylmalonyl-CoA             |     |     |    |   |   |   |   |   |                           |            | Methylmalonyl-CoA             |     |     |    |   |   |   |   |   |   |   |   |
|                          | Malonyl-CoA                   |     |     |    |   |   |   |   |   |                           |            | Malonyl-CoA                   |     |     |    |   |   |   |   |   |   |   |   |
|                          | Hexylmalonyl-CoA              |     |     |    |   |   |   |   |   |                           |            | Hexylmalonyl-CoA              |     |     |    |   |   |   |   |   |   |   |   |
|                          | 3-oxobutylmalonyl-CoA         |     |     |    |   |   |   |   |   |                           |            | 3-oxobutylmalonyl-CoA         |     |     |    |   |   |   |   |   |   |   |   |
|                          | Ethylmalonyl-CoA              |     |     |    |   |   |   |   |   |                           |            | Ethylmalonyl-CoA              |     |     |    |   |   |   |   |   |   |   |   |
|                          | BenzyImalonyl-CoA             |     |     |    |   |   |   |   |   |                           |            | BenzyImalonyl-CoA             |     |     |    |   |   |   |   |   |   |   |   |
|                          | Isobutylmalonyl-CoA           |     |     |    |   |   |   |   |   |                           |            | Isobutylmalonyl-CoA           |     |     |    |   |   |   |   |   |   |   |   |
|                          | Butylmalonyl-CoA              |     |     |    |   |   |   |   |   |                           |            | Butylmalonyl-CoA              |     |     |    |   |   |   |   |   |   |   |   |
|                          | 1-hydroxyisopentylmalonyl-CoA |     |     |    |   |   |   |   |   |                           |            | 1-hydroxyisopentylmalonyl-CoA |     |     |    |   |   |   |   |   |   |   |   |
|                          | 2-chloroethylmalonyl-CoA      |     |     |    |   |   |   |   |   |                           |            | 2-chloroethylmalonyl-CoA      |     |     |    |   |   |   |   |   |   |   |   |
|                          | Predicted label               |     |     |    |   |   |   |   |   |                           |            | Predicted label               |     |     |    |   |   |   |   |   |   |   |   |

**Figure S8.** A comparison between existing and our computational models. (a) Summary statistics of each model predicting AT substrate specificity. (b) Confusion matrices of each model predicting AT substrate specificity.



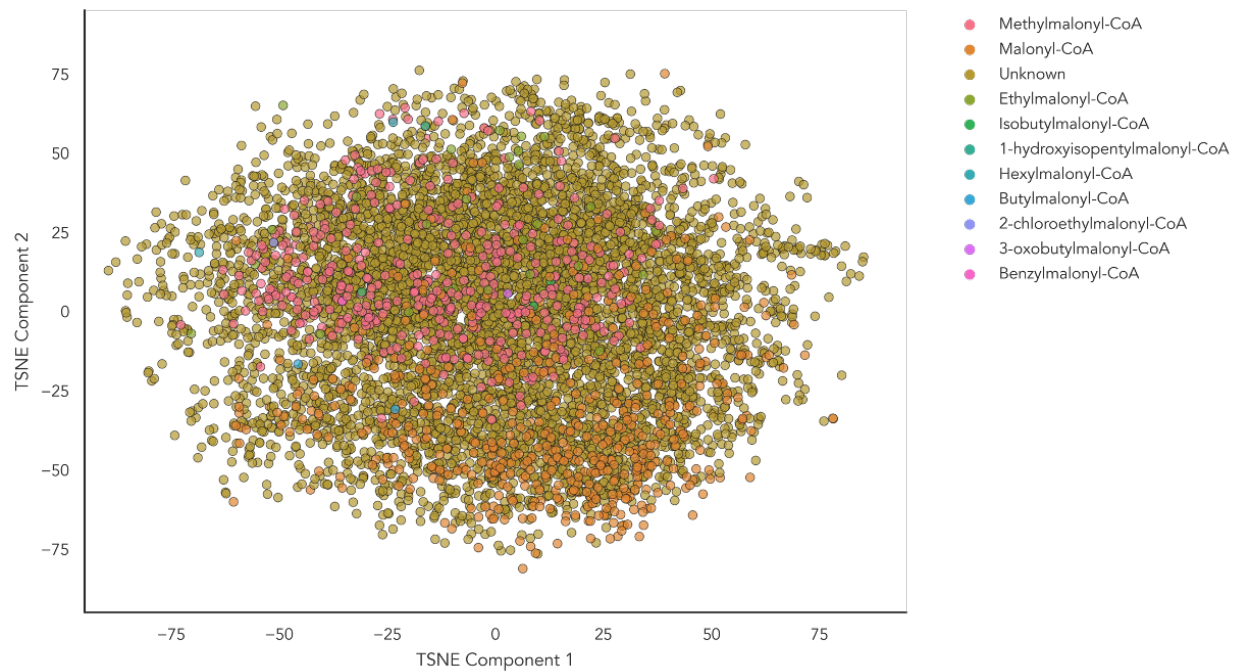

**Figure S9.** Analysis of the active site shape for 6000+ ATs with and without substrate annotations. Two-dimensional decomposition of active site shape using t-SNE colored by annotated substrate.

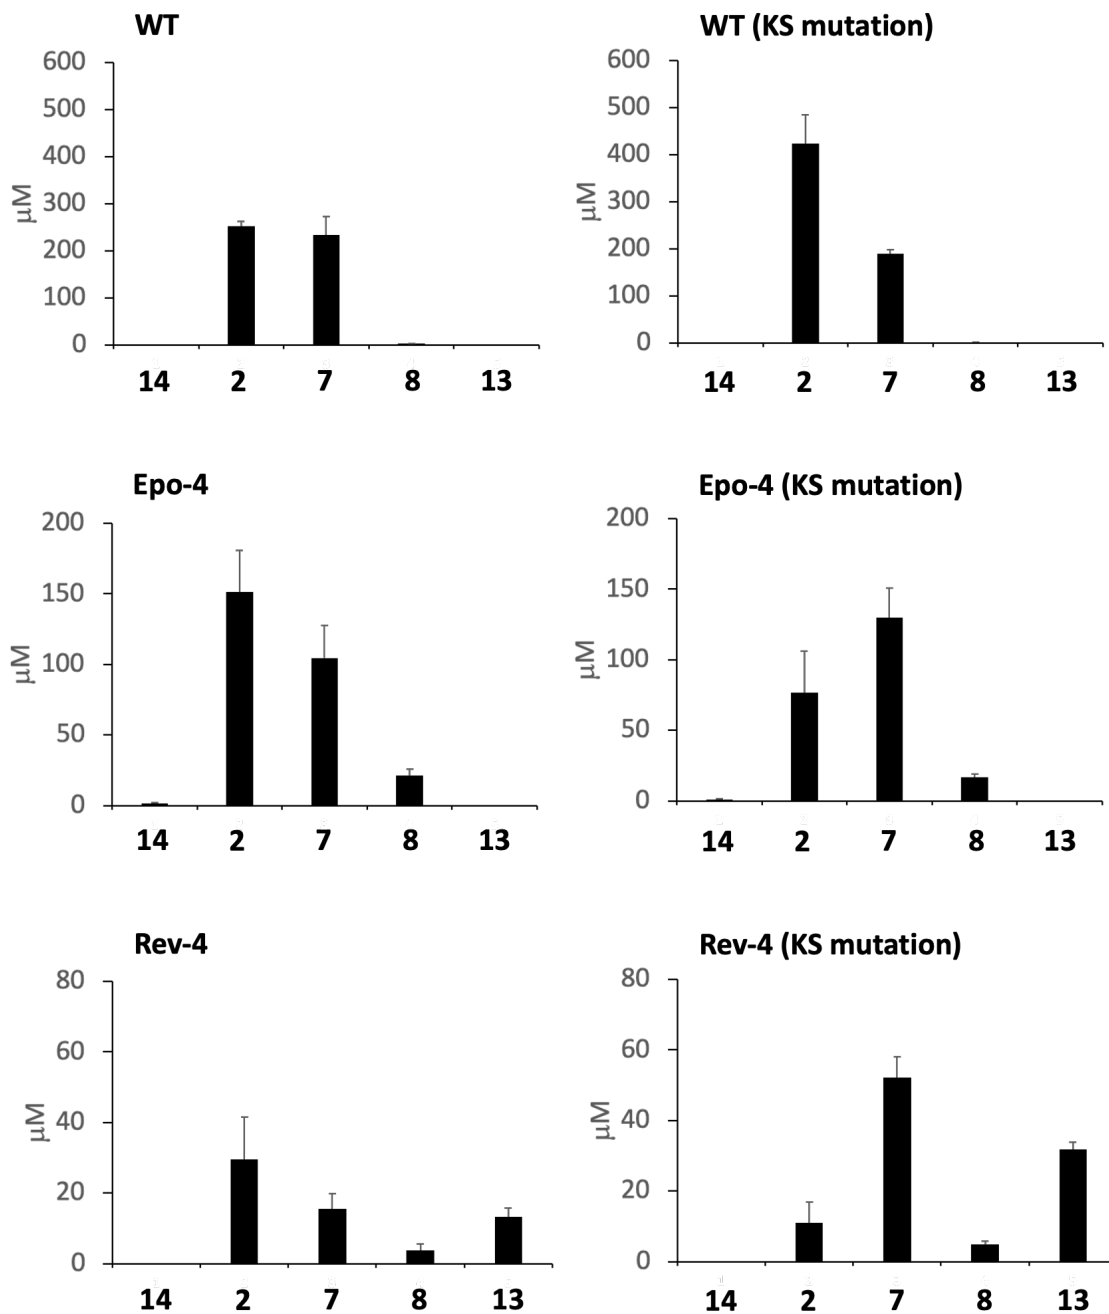

**Figure S10.** Production of polyketides **2**, **7**, **8**, **13**, and **14** by KS-mutated AT-exchanged PKSs. Polyketides were quantified at 16 h using the corresponding authentic standards. Each value and error are calculated from three independent experiments. Abbreviations (see Figure 1 and Table 1).

## 2. Supplementary tables

**Table S1.** Amino acid sequences of DEBS M6+TE and the AT exchanged mutants (amino acid sequences from WT = black, amino acid sequences from donor PKS modules = red).

|       |                                                                                                                                                                                                                                                                                                                                                                                                                                                                                                                                                                                                                                                                                                                                                                                                                                                                                                                                                                                                                                                                                                                                                                                                                                                                                                                                                                                                                                                                                                                                                                                                                                                                                                                                                                                                                                                                                                                                                                  |
|-------|------------------------------------------------------------------------------------------------------------------------------------------------------------------------------------------------------------------------------------------------------------------------------------------------------------------------------------------------------------------------------------------------------------------------------------------------------------------------------------------------------------------------------------------------------------------------------------------------------------------------------------------------------------------------------------------------------------------------------------------------------------------------------------------------------------------------------------------------------------------------------------------------------------------------------------------------------------------------------------------------------------------------------------------------------------------------------------------------------------------------------------------------------------------------------------------------------------------------------------------------------------------------------------------------------------------------------------------------------------------------------------------------------------------------------------------------------------------------------------------------------------------------------------------------------------------------------------------------------------------------------------------------------------------------------------------------------------------------------------------------------------------------------------------------------------------------------------------------------------------------------------------------------------------------------------------------------------------|
| WT    | <p>MSGDNGMTEEKLRRLKRTVTELDVSVARLREVEHRASDPIAIVGMACRFPPGGVHNPGELWEFIVGGGDAVTEMP<br/> DRGWLDALFDPDPQRHGTSYSRHGAFLDGAADFDAFFGISPREALAMPQQRQVLETTWELFENAGIDPHSLRG<br/> SDTGVLGAAYQGYGQDAVVPEDSEGYLLTGNSSAVVSGRVAYVVLGLEGPAVTVDTACSSSLVALHSACGSLRDGD<br/> CGLAVAGGVSVMAGPEVFTEFSRQGGLAVDGRCKAFSAEADGFGFAEGVAVVLLQRLSDARRAGRQVLGVVAGSAI<br/> NQDGASNGLAAPSGVAQQRVIRKAWARAGITGADVAVVEAHGTGTRLDGPVEASALLATYGKSRGSSGPVLLGSVK<br/> SNIGHAQAAAGVAGVIKVVLLGNRGLVPPMLCRGERSPLIEWSSGGVELAEAVSPWPPAADGVRRAAGVSAFGVSGT<br/> NAHVI IAEPPPEPEPLPEPGPVGLAAANSVPVLLSARTETALAAQARLLESADVDSVPLTALASALATGRAHLPRR<br/> AALLAGDHEQLRGLRAVAEGVAAPGATTGTASAGSVFVFPGGAQWEGMARGLLSVPVFAESIAECDAVLSEVA<br/> GFASAEVLEQRPDAPSLEKRVVQPVFLFSVMVSLARLWLGACGVS P SAVI GHSQGEIAAAVAVGVLSELDGVRVVAL<br/> RAKALRALAGKGMVSLAAPGERARALIA PWEDRISVAAVNSPSSVVVSGDPEALAEELVARCEDEGVRAKTL PVDY<br/> ASHSRHVEEIRETILADLDGISARRAIPLYSTLHGERRDGDMDGPRYWDNLSQVRFDEAVSAAVADGHATFVE<br/> MSPHPVLTAAVQEI AADAVAIGSLHRDTAEHLIAELARAHVHGVAVDWRNVFPAAFPVLDLPNYPFEPQRYWLAP<br/> VSDQLADSRVYRVDWRPLATTPVDLEGGFLVHGSAPESLTSAVEKAGGRVVPVASADREALAAALREVPGEVAGVLS<br/> VHTGAATHLALHQLSLEAGVRAPLWLVT SRAVALGESEPVDPQAMVWGLGRVMGLET PERWGGVLDLPAEPAPGD<br/> GEAFVACL GADGHEDQVAIRDHARYGRRLVRAPLGTRESSWEPAGTALVTGGTGALGGHVARHLARCGVEDLVLVS<br/> RRGVDAPGAAELEAEELVALGAKTTITACDVADREQLSKLLEELRGQGRPVRTVVHTAGVPESRPLHEIGELESVCA<br/> AKVTGARLLDELCPDAET FVLFSSGAGVWGSANLGAYSAANAYLDALAHRRRAEGRRAATSVAWGAWAGEGMATGDL<br/> EGLTRRGLRPMAPERAIRALHQALDNGDTCVSIADVDWERFAVGFTAARPRLLDELVT PAVGAVPAVQAAPAREM<br/> TSQELLEFT HSHVAAILGHSSPDAVGQDQPFTELGFDSLTA VGLRNQLQQATGLALPATLVFEHPTVRRRLADHIGQ<br/> QLDSGTPAREASSALRDGYRQAGVSGRVRSYLDLLAGLSDFREHFDGSDGFSLDLVDMDGPGEVTVICAGTAAI<br/> SGPHEFTRLAGALRGIAPVRAVPQPGYEEGEPLPSSMAAAVAVQADAVIRTQGDKPFVAVAGHSAGALMAYALATEL<br/> LDRGHPPRGVVLIDVYPPGHQDAMNAWLEELTATLFDRETVMDDTRLTALGAYDRLTGQWRPRETGLPTLLVSAG<br/> EPMGPWPDDSWKPTWPFHDTVAVPGDHFMTMVEHADAIARHIDAWLGGGNSSSVDKLAALAEHHHHHH*</p>    |
| Epo-4 | <p>MSGDNGMTEEKLRRLKRTVTELDVSVARLREVEHRASDPIAIVGMACRFPPGGVHNPGELWEFIVGGGDAVTEMP<br/> DRGWLDALFDPDPQRHGTSYSRHGAFLDGAADFDAFFGISPREALAMPQQRQVLETTWELFENAGIDPHSLRG<br/> SDTGVLGAAYQGYGQDAVVPEDSEGYLLTGNSSAVVSGRVAYVVLGLEGPAVTVDTACSSSLVALHSACGSLRDGD<br/> CGLAVAGGVSVMAGPEVFTEFSRQGGLAVDGRCKAFSAEADGFGFAEGVAVVLLQRLSDARRAGRQVLGVVAGSAI<br/> NQDGASNGLAAPSGVAQQRVIRKAWARAGITGADVAVVEAHGTGTRLDGPVEASALLATYGKSRGSSGPVLLGSVK<br/> SNIGHAQAAAGVAGVIKVVLLGNRGLVPPMLCRGERSPLIEWSSGGVELAEAVSPWPPAADGVRRAAGVSAFGVSGT<br/> NAHVVLEEAPAVELWPAAPERSAELLVLSGKSEALDAQAARLREHLDMPHPELGLGDVAFSLATTRSAMNHLAVA<br/> VTSREGLLAALS AVAQQT PPGAARCIASSSRGKLAFLFTGQGAQTPGMGRGLCAAWPAFREAFDRCVALFDRELD<br/> RPLCEVMWAEPGSAESLLLDQTAFTQPALFTVEYAL TALWRSWGVEPELVAGHSAGELVAACVAGVFSLEDGVRV<br/> AARGRLMQLSAGGAMVSLGAPEAEVAAAVAPHAAVWSIAAVNGPEQVVIAGVEQAVQAI AAGFAARGVTRKRLHV<br/> SHASHPLMEPLMEEFGRVAASVTYRRPSVSLVSNLSGKVVTDLSAPGYWVRHVREAVRFADGVKALHEAGAGTF<br/> LEVGPKPTLLGLLPACLPEAEPTLLASLRAGREEAGVLEALGRLWAAGGSVSWPGVFP TAGRRVLDLPNYPFEPQR<br/> YWLAPVSDQLADSRVYRVDWRPLATTPVDLEGGFLVHGSAPESLTSAVEKAGGRVVPVASADREALAAALREVPGE<br/> VAGVLSVHTGAATHLALHQLSLEAGVRAPLWLVT SRAVALGESEPVDPQAMVWGLGRVMGLET PERWGGVLDLPA<br/> EPAPGDGEAFVACL GADGHEDQVAIRDHARYGRRLVRAPLGTRESSWEPAGTALVTGGTGALGGHVARHLARCGVE<br/> DLVLSRRGVDAPGAAELEAEELVALGAKTTITACDVADREQLSKLLEELRGQGRPVRTVVHTAGVPESRPLHEIGE<br/> LESVCAAKVTGARLLDELCPDAET FVLFSSGAGVWGSANLGAYSAANAYLDALAHRRRAEGRRAATSVAWGAWAGEG<br/> MATGDLEGLTRRGLRPMAPERAIRALHQALDNGDTCVSIADVDWERFAVGFTAARPRLLDELVT PAVGAVPAVQA<br/> APAREMTSQELLEFT HSHVAAILGHSSPDAVGQDQPFTELGFDSLTA VGLRNQLQQATGLALPATLVFEHPTVRR<br/> ADHIGQQQLDSGTPAREASSALRDGYRQAGVSGRVRSYLDLLAGLSDFREHFDGSDGFSLDLVDMDGPGEVTVIC<br/> AGTAAISGPHEFTRLAGALRGIAPVRAVPQPGYEEGEPLPSSMAAAVAVQADAVIRTQGDKPFVAVAGHSAGALMAY<br/> ALATEL LDRGHPPRGVVLIDVYPPGHQDAMNAWLEELTATLFDRETVMDDTRLTALGAYDRLTGQWRPRETGLPT<br/> LLVSAGEPMPGPWPDDSWKPTWPFHDTVAVPGDHFMTMVEHADAIARHIDAWLGGGNSSSVDKLAALAEHHHHHH*</p> |
| Mon-5 | <p>MSGDNGMTEEKLRRLKRTVTELDVSVARLREVEHRASDPIAIVGMACRFPPGGVHNPGELWEFIVGGGDAVTEMP<br/> DRGWLDALFDPDPQRHGTSYSRHGAFLDGAADFDAFFGISPREALAMPQQRQVLETTWELFENAGIDPHSLRG<br/> SDTGVLGAAYQGYGQDAVVPEDSEGYLLTGNSSAVVSGRVAYVVLGLEGPAVTVDTACSSSLVALHSACGSLRDGD<br/> CGLAVAGGVSVMAGPEVFTEFSRQGGLAVDGRCKAFSAEADGFGFAEGVAVVLLQRLSDARRAGRQVLGVVAGSAI<br/> NQDGASNGLAAPSGVAQQRVIRKAWARAGITGADVAVVEAHGTGTRLDGPVEASALLATYGKSRGSSGPVLLGSVK<br/> SNIGHAQAAAGVAGVIKVVLLGNRGLVPPMLCRGERSPLIEWSSGGVELAEAVSPWPPAADGVRRAAGVSAFGVSGT<br/> NAHVILEEAPPEEAAAETPAEGTGAVVPVWVSGRGEALRAQAQLAEHVRRDDQRPASPLEVWGLATTRSVE<br/> NRAVVGGDRDALLDGLRSLAAGEASPDVVS GAVGPTGPGPVVMVFPGGGQVWGMGARLLDESPVFAARIAECEQA<br/> LSAYVDWSLTDVLRGDGSELARIDVVQVFLWAVMVALAAVWADQGEIPAAVVGHSQGEIAAACVVGAI SLDEAARI</p>                                                                                                                                                                                                                                                                                                                                                                                                                                                                                                                                                                                                                                                                                                                                                                                                                                                                                                                                                                                                                                                                                                                                                                                                     |

|              |                                                                                                                                                                                                                                                                                                                                                                                                                                                                                                                                                                                                                                                                                                                                                                                                                                                                                                                                                                                                                                                                                                                                                                                                                                                                                                                                                                                                                                                                                                                                                                                                                                                                                                                                                                                                                                                                                                                                                                                                      |
|--------------|------------------------------------------------------------------------------------------------------------------------------------------------------------------------------------------------------------------------------------------------------------------------------------------------------------------------------------------------------------------------------------------------------------------------------------------------------------------------------------------------------------------------------------------------------------------------------------------------------------------------------------------------------------------------------------------------------------------------------------------------------------------------------------------------------------------------------------------------------------------------------------------------------------------------------------------------------------------------------------------------------------------------------------------------------------------------------------------------------------------------------------------------------------------------------------------------------------------------------------------------------------------------------------------------------------------------------------------------------------------------------------------------------------------------------------------------------------------------------------------------------------------------------------------------------------------------------------------------------------------------------------------------------------------------------------------------------------------------------------------------------------------------------------------------------------------------------------------------------------------------------------------------------------------------------------------------------------------------------------------------------|
|              | <p>VAVRSVLLRQLSGRGGMASLGMGQEQAADLIDGHPGVVVAAVNGPSSSTVI SGPPEGIAAVVADAQERGLRARAVAS<br/> DVAGHGQQLDAILDQLTEGLAGIRPAATDVAFYSTVTAGHLTDTTTELDTAYWVRNVRRTVRFADTTIDALLADGYRL<br/> FIEVSPHPVLNLALEGLIERAAVPATVVTPLRRDHGDTTQLARAAAHAFAGADVDWRRWFPADPAPRTVDLPNYP<br/> FEPQRYWLAPEVSDQLADSRVVDWRPLATTPVDLEGGFLVHGSAPESLTSAVEKAGGRVVPVASADREALAAALR<br/> EVPGEVAGVLSVHTGAATHLALHQS LGEAGVRAPLWLVT SRAVALGESEPVDPQAMVWGLGRVMGLTTPERWGG<br/> VDLPAEPAPGDGEAFVACL GADGHEDQVAIRDHARYGRRLVRAPLGTRESSWEPAGTALVTGGTGALGGHVARHLA<br/> RCGVEDLVLVSRRGVDAPGAAELEAEALVALGAKTTITACDVADREQLSKLLEELRGQGRPVRTVVHTAGVPESRPL<br/> HEIGELESVCAAKVTGARLLDELCPDAETFVLFSSGAGVWGSANLGAYSAANAYLDALAHRRRAEGRATSVAWGA<br/> WAGEGMATGDLEGLTRRGLRPMAPERAIRALHQALDNGDTCVSIADVDWERFVAVGFTAARPRPLLDLVT PAVGAV<br/> PAVQAAPAREMTSQELLEFTSHVAAI LGHSSPDAVGQDQPFTELGFDSLTAVGLRNQLQQATGLALPATLVFEHP<br/> TVRRLADHIGQQLDSGTPAREASSALRDGYRQAGVSGRVRSYDL LAGLSDFREHF DGS DGFSLDLVDMADGPGEV<br/> TVICCAGTAAISGPHEFTRLGALRGIAPVRAVPQPGYEEGEP LPSMAA VAVQADAVIRTQDKPFVVAGHSAG<br/> ALMAYALATELLDRGHPPRGVVLIDVYPPGHQDAMNAWLEELTATLFDRETVRMDDTRLTALGAYDRLTGQWRPRE<br/> TGLPTLLVSAGEPMGPWPDDSWKPTWPF EHD TVAVPGDHFTMVQEHADAIARHIDAWLGGGNSSVDKLAALAEHH<br/> HHHH*</p>                                                                                                                                                                                                                                                                                                                                                                                                                                                                                                                                                                                                                                                                                                                                                                                        |
| <p>Nid-5</p> | <p>MSGDNGMTEEKLRRLKRTVTELD SVTARLREVEHRASDPIAIVGMACRFPPGGVHNPGELWEFIVGGGDAVTEMPT<br/> DRGWLDLALFDPDPQRHGTSYSRHGAFLDGAADFDAFFGISPREALAMPQQRQVLETTWELFENAGIDPHSLRG<br/> SDTGVLGAAAYQGYGQDAVVPEDSEG YLLTGNSSAVVSGRVAYVLGLEGPAVTVDTACSSSLVALHSACGLRDGD<br/> CGLAVAGGV SVMAGPEVTFEFSRQGLAVDGRCKAFSAEADGFGFAEGVAVVLLQRLSDARRAGRQVLG VVAGSAI<br/> NQDGASNGLAAPSGVAQQRVIRKAWARAGITGADVAVEAHGTGTRLDGPVEASALLATYGKSRGSSGPVLLG SVK<br/> SNIGHAQAAAGVAGVIKVV LGLNRGLVPPMLCRGERSPLIEWSSGGVELAEAVSPWPPAADGVRRAGVS AFVSGT<br/> NAHVVIEEPPPTAVPESEPEPSAEAPRQEQRDRWEGVTVPLMLSAHSEALREQARRLCAQLLARPEQRPADVG<br/> HALLSTRARFPRAAVVGESMTELAELDAVAEGGPHPLAATGTAGTADR VVVFVFGQGSQWAGMAEGLLERSGAF<br/> RSAADSCDAALRPYLGWSVLSVLRGEPDAPSLDRVDVVPVLF TMMVSLAAVWRALGVEPAAVVGHSSQGEIAAAHV<br/> AGALSDDSARIVALRSRAWLGLAGKGMVAVPMPAEELRPRLV TWGDRLAVA AVNSPGSCAVAGDPEALAEALVAL<br/> LTGEGVHARPIPGVDTAGHSPQVDALRAHLLLEVLAPVAPRPADI PFYSTVTGGLLDGTELDATYWRNMPREPVFE<br/> RATRALIADGHDFLETSHPMLAVALEQTVTDAGTDAAVLGT LRRRHGGPRALALAVCRAFAHGV EVDPEAVFGP<br/> GARPVDLPNYPFEPQRYWLAPEVSDQLADSRVVDWRPLATTPVDLEGGFLVHGSAPESLTSAVEKAGGRVVPVAS<br/> ADREALAAALREVPGEVAGVLSVHTGAATHLALHQS LGEAGVRAPLWLVT SRAVALGESEPVDPQAMVWGLGRVM<br/> GLETPERWGGVLDLPAEPAPGDGEAFVACL GADGHEDQVAIRDHARYGRRLVRAPLGTRESSWEPAGTALVTGGTG<br/> ALGGHVARHLARCGVEDLVLVSRRGVDAPGAAELEAEALVALGAKTTITACDVADREQLSKLLEELRGQGRPVRTVV<br/> HTAGVPE SRPLHEIGELESVCAAKVTGARLLDELCPDAETFVLFSSGAGVWGSANLGAYSAANAYLDALAHRRRAE<br/> GRAATSVAWGAWAGEGMATGDLEGLTRRGLRPMAPERAIRALHQALDNGDTCVSIADVDWERFVAVGFTAARPRPLD<br/> DELVTPAVGAVPAVQAAPAREMTSQELLEFTSHVAAI LGHSSPDAVGQDQPFTELGFDSLTAVGLRNQLQQATGL<br/> ALPATLVFEHPTVRRLADHIGQQLDSGTPAREASSALRDGYRQAGVSGRVRSYDL LAGLSDFREHF DGS DGFSLD<br/> LVDMADGPGEVTVICCAGTAAISGPHEFTRLGALRGIAPVRAVPQPGYEEGEP LPSMAA VAVQADAVIRTQGD<br/> KPFVVAGHSAGALMAYALATELLDRGHPPRGVVLIDVYPPGHQDAMNAWLEELTATLFDRETVRMDDTRLTALGAY<br/> DRLTGQWRPRETGLPTLLVSAGEPMGPWPDDSWKPTWPF EHD TVAVPGDHFTMVQEHADAIARHIDAWLGGGNSS<br/> VDKLAALAEHHHHHH*</p>          |
| <p>Rev-4</p> | <p>MSGDNGMTEEKLRRLKRTVTELD SVTARLREVEHRASDPIAIVGMACRFPPGGVHNPGELWEFIVGGGDAVTEMPT<br/> DRGWLDLALFDPDPQRHGTSYSRHGAFLDGAADFDAFFGISPREALAMPQQRQVLETTWELFENAGIDPHSLRG<br/> SDTGVLGAAAYQGYGQDAVVPEDSEG YLLTGNSSAVVSGRVAYVLGLEGPAVTVDTACSSSLVALHSACGLRDGD<br/> CGLAVAGGV SVMAGPEVTFEFSRQGLAVDGRCKAFSAEADGFGFAEGVAVVLLQRLSDARRAGRQVLG VVAGSAI<br/> NQDGASNGLAAPSGVAQQRVIRKAWARAGITGADVAVEAHGTGTRLDGPVEASALLATYGKSRGSSGPVLLG SVK<br/> SNIGHAQAAAGVAGVIKVV LGLNRGLVPPMLCRGERSPLIEWSSGGVELAEAVSPWPPAADGVRRAGVS AFVSGT<br/> NAHVIEAAPETEAEPPAADRPGDEDPGLFAPHTAMAWTLSARS AKALAGQAGRLLEERVQDAPELDPADVGSLLR<br/> SRALFEHRAVVVGADRAELTAGLAALAAAGEPAANVVTGAARS GGRAVVFVFGQGS HWEGMAKELLATSPVFAAKVQ<br/> ECAEALDPLVDWSLLEVLRHPEESAELLSRIDVYHPVFF TMMVALAEVWRALGVEPAAVVGHSSQGEVAAAHVAGAL<br/> SLSDAYRVVLRGNI FENVLLGKGAIASVKLGQEA VEEQIAGYERLSVAGVNSRS GVTVSGSMEDVKAYLAECEAA<br/> GVPARILGMAASHSPAELPLRERLLGELS FVRPRAGTI PMYSTVDAAALVDTATLDAEYWRNLRSPVLF EQTTRVL<br/> VDAGFSAFVEASSHPVLTVP LQETLDTFYPDLAADA AVTGT LRRNEGGPARMLASAAHLFAHGV PVVWDGLFAGRP<br/> RRVVDLPNYPFEPQRYWLAPEVSDQLADSRVVDWRPLATTPVDLEGGFLVHGSAPESLTSAVEKAGGRVVPVASA<br/> DREALAAALREVPGEVAGVLSVHTGAATHLALHQS LGEAGVRAPLWLVT SRAVALGESEPVDPQAMVWGLGRVMG<br/> LETPERWGGVLDLPAEPAPGDGEAFVACL GADGHEDQVAIRDHARYGRRLVRAPLGTRESSWEPAGTALVTGGTG<br/> LGGHVARHLARCGVEDLVLVSRRGVDAPGAAELEAEALVALGAKTTITACDVADREQLSKLLEELRGQGRPVRTVVH<br/> TAGVPESRPLHEIGELESVCAAKVTGARLLDELCPDAETFVLFSSGAGVWGSANLGAYSAANAYLDALAHRRRAE<br/> RAATSVAWGAWAGEGMATGDLEGLTRRGLRPMAPERAIRALHQALDNGDTCVSIADVDWERFVAVGFTAARPRPLD<br/> ELVTPAVGAVPAVQAAPAREMTSQELLEFTSHVAAI LGHSSPDAVGQDQPFTELGFDSLTAVGLRNQLQQATGLA<br/> LPATLVFEHPTVRRLADHIGQQLDSGTPAREASSALRDGYRQAGVSGRVRSYDL LAGLSDFREHF DGS DGFSLDL<br/> VDMADGPGEVTVICCAGTAAISGPHEFTRLGALRGIAPVRAVPQPGYEEGEP LPSMAA VAVQADAVIRTQGD<br/> PFVVAGHSAGALMAYALATELLDRGHPPRGVVLIDVYPPGHQDAMNAWLEELTATLFDRETVRMDDTRLTALGAYD<br/> RLTGQWRPRETGLPTLLVSAGEPMGPWPDDSWKPTWPF EHD TVAVPGDHFTMVQEHADAIARHIDAWLGGGNSS<br/> VDKLAALAEHHHHHH*</p> |

|        |                                                                                                                                                                                                                                                                                                                                                                                                                                                                                                                                                                                                                                                                                                                                                                                                                                                                                                                                                                                                                                                                                                                                                                                                                                                                                                                                                                                                                                                                                                                                                                                                                                                                                                                                                                                                                                                                                                                                                                                                                                                                                                                     |
|--------|---------------------------------------------------------------------------------------------------------------------------------------------------------------------------------------------------------------------------------------------------------------------------------------------------------------------------------------------------------------------------------------------------------------------------------------------------------------------------------------------------------------------------------------------------------------------------------------------------------------------------------------------------------------------------------------------------------------------------------------------------------------------------------------------------------------------------------------------------------------------------------------------------------------------------------------------------------------------------------------------------------------------------------------------------------------------------------------------------------------------------------------------------------------------------------------------------------------------------------------------------------------------------------------------------------------------------------------------------------------------------------------------------------------------------------------------------------------------------------------------------------------------------------------------------------------------------------------------------------------------------------------------------------------------------------------------------------------------------------------------------------------------------------------------------------------------------------------------------------------------------------------------------------------------------------------------------------------------------------------------------------------------------------------------------------------------------------------------------------------------|
| Div-4  | <p>MSGDNGMTEEKLRRLYLRKRTVTELDVSVTARLREVEHRASDPIAIVGMACRFPPGGVHNPGELWEFIVGGGDAVTEMPT<br/> DRGWLDLALFDDPDPQRHGTSYSRHGAFDGAADFDAFFFGISPREALAMPQQRQVLETTWELFENAGIDPHSLRG<br/> SDTGVFLGAAAYQGYGQDAVVPEDSEGYLLTGNSSAVVSGRVAYVVLGLEGPAVTVDTACSSSLVALHSACGSLRDGD<br/> CGLAVAGGVSVMAGPEVFTFESRQGGGLAVDGRCKAFSAEADGFGFAEGVAVVLLQRLSDARRAGRQVLGVVAGSAI<br/> NQDGASNGLAAPSGVAQQRVIRKAWARAGITGADVAVVEAHGTGTRLGDPVEASALLATYGKSRGSSGPVLLGSVK<br/> SNIGHAQAAAGVAGVIKVVLLGNRGLVPPMLCRGERSPLIEWSSGGVELAEAVSPWPPAADGVRRAVSAFVGS<br/> <b>GT</b><br/> <b>NAHVILEQAPEPAPEPVSPEPATLEPAAPGPAVAEPVSPGPAGPEPADNRPVFATAPAPLLVSGRGESALRAQAR</b><br/> <b>RLHAHLDTLHDLPHDPDRPDGASDVPGDLGPGGLEPGGVELGDVAWSLATTRAVHRRRAVVLADDRDEALAA</b><br/> <b>LTALAEPTPSPSLVPGSAPDADPQVVFVPGQGSQWPGMAARLLDESVPFADRMACEDRAVAGELVDWSVLDVVTGA</b><br/> <b>AGAPSPERIEILQPVLFAVNVSLAAVWQAAGVEPAAVVGHSGEVAFAAGALSLEDAARTVLRSAFAELVG</b><br/> <b>RGAVSVLEAGSEEVERRIAHDGRALGGRNSPAASTVVDTEALTEFVARCKADGIRAQVVGSTVASHCAQVDP</b><br/> <b>HDRIVEMLAGIAPKPARVPFYSTVDAEIDTESLTGEYVFRNARFPVEFDRTRVALLADGHQHOFVECSAHPVLTVA</b><br/> <b>TQATSEDFGAEAVAVGSLRRQEGGARLLTSFAEGFVRGLPVDWAAVLGGGRRVDLPNYPFEPQRYWLAPEVSDQL</b><br/> ADSRVVDWRPLATTPVDLEGGFLVHGSAPESLTSAVEKAGGRVVPVASADREALAAALREVPGEVAGVLSVHTGA<br/> ATHLALHQSLEAGVRAPLWLVTSTRAVALGESEPVDEPEQAMVWGLGRVMGLETPERWGLVDLPAEPAPGDGEAFV<br/> ACLGADGHEDQVAIRDHARYGRRLVRAPLGTRESSWEPAGTALVTGGTGALGGHVARHLARCQVEDLVLSRRGVD<br/> APGAAELEAEALVALGAKTTITACDVADREQLSKLLEELRGQGRPVRTVVHTAGVPESRPLHEIGELESVCAAKVTG<br/> ARLLDELCPDAETFVLFSSGAGVWGSANLGAYSAANAYLDALAHRRRAEGRRAATSVAWGAWAGEGMATGDLEGLTR<br/> RGLRPMAPERAIRALHQALDNGDTCVSIADVDWERFVAVGFTAARPRLLDELVTPAVGAVPAVQAAPAREMTSQUEL<br/> LEFTHSHVAAIILGHSSPDVAVGQDQPFTELGFDSLAVGLRNQLQOATGLALPATLVFEHPTVRRADHIGQQLDSDG<br/> TPAREASSALRDGYRQAGVSGRVRSYLDLLAGLSDFREHFDDGSDGFSLDLVDMDGPGEVTVICCAGTAAISGPHE<br/> FTRLGALRGIAPVRAVPQPGYEEGPELPSMAAFAVQADAVIRTOGDKPFVAVGHSAGALMAYALATELLDRGH<br/> PPRGVVLIDVYPPGHQDAMNAWLEELTATLFDRETVMDDTRLTALGAYDRLTGQWRPRETGLPTLLVSAGEPMGP<br/> WPDDSWKPTWPFHEDTVAVPGDHFTMVQEHADAIARHIDAWLGGGNSSSVDKLAALAEHHHHHH*</p>                             |
| Ans-8  | <p>MSGDNGMTEEKLRRLYLRKRTVTELDVSVTARLREVEHRASDPIAIVGMACRFPPGGVHNPGELWEFIVGGGDAVTEMPT<br/> DRGWLDLALFDDPDPQRHGTSYSRHGAFDGAADFDAFFFGISPREALAMPQQRQVLETTWELFENAGIDPHSLRG<br/> SDTGVFLGAAAYQGYGQDAVVPEDSEGYLLTGNSSAVVSGRVAYVVLGLEGPAVTVDTACSSSLVALHSACGSLRDGD<br/> CGLAVAGGVSVMAGPEVFTFESRQGGGLAVDGRCKAFSAEADGFGFAEGVAVVLLQRLSDARRAGRQVLGVVAGSAI<br/> NQDGASNGLAAPSGVAQQRVIRKAWARAGITGADVAVVEAHGTGTRLGDPVEASALLATYGKSRGSSGPVLLGSVK<br/> SNIGHAQAAAGVAGVIKVVLLGNRGLVPPMLCRGERSPLIEWSSGGVELAEAVSPWPPAADGVRRAVSAFVGS<br/> <b>GT</b><br/> <b>NAHVILEQAPEPTSVNASDEKARVLGDSVVPVLVSARGEAGLAGQARRLGAFLRQRELDLLEVGRSLVQSRGLLP</b><br/> <b>DRAIVLGAPEEALTDALDAVAGGESATGVVKGTAASVVGGTVFVFPQGGSHWAGMRELLDTSVPFATRMAECAEA</b><br/> <b>LDPLTGWSLLDVVRQGGQTPSLDDLDVQPVSWALMLSLAAALWEACGVVPAVAVGHSQGEIAAACFAGALPLPDA</b><br/> <b>RLVHRARAIRAELSGHGMASLVASVKAVSVLVEELPGLAIAAVNGPSSVVVSGELPALEELLARCRTGEGIHARR</b><br/> <b>IHGANAAGHSSQMEVLRDSFLEAFAAVSGGPPSRVPLYSTVTGRLQDTTELDEYVWYRNLRTVQFDPAIRSLAADG</b><br/> <b>HGVFIEVSSHPVLAAGVQDVLEELQAPAVVTGSLHRDEGGPRRFLASLAHLHTHGQVQSWEAVLGRGTERPVDLPN</b><br/> <b>YPFEPQRYWLAPEVSDQLADSRVVDWRPLATTPVDLEGGFLVHGSAPESLTSAVEKAGGRVVPVASADREALAA</b><br/> <b>LREVPGEVAGVLSVHTGAATHLALHQSLEAGVRAPLWLVTSTRAVALGESEPVDEPEQAMVWGLGRVMGLETPERWG</b><br/> <b>LDLPAEPAPGDGEAFVACLADGHEDQVAIRDHARYGRRLVRAPLGTRESSWEPAGTALVTGGTGALGGHVARH</b><br/> <b>LARCQVEDLVLSRRGVDAPGAAELEAEALVALGAKTTITACDVADREQLSKLLEELRGQGRPVRTVVHTAGVPESR</b><br/> <b>PLHEIGELESVCAAKVTGARLLDELCPDAETFVLFSSGAGVWGSANLGAYSAANAYLDALAHRRRAEGRRAATSVAW</b><br/> <b>GAWAGEGMATGDLEGLTRRGLRPMAPERAIRALHQALDNGDTCVSIADVDWERFVAVGFTAARPRLLDELVTPAVG</b><br/> <b>AVPAVQAAPAREMTSQUELLEFTHSHVAAIILGHSSPDVAVGQDQPFTELGFDSLAVGLRNQLQOATGLALPATLVFE</b><br/> <b>HPTVRRADHIGQQLDSDGTPAREASSALRDGYRQAGVSGRVRSYLDLLAGLSDFREHFDDGSDGFSLDLVDMDGPG</b><br/> <b>EVTVICCAGTAAISGPHEFTRLGALRGIAPVRAVPQPGYEEGPELPSMAAFAVQADAVIRTOGDKPFVAVGHS</b><br/> <b>AGALMAYALATELLDRGHPPRGVVLIDVYPPGHQDAMNAWLEELTATLFDRETVMDDTRLTALGAYDRLTGQWRP</b><br/> <b>RETGLPTLLVSAGEPMGPWPDDSWKPTWPFHEDTVAVPGDHFTMVQEHADAIARHIDAWLGGGNSSSVDKLAALAE</b><br/> <b>HHHHHH*</b></p> |
| San-13 | <p>MSGDNGMTEEKLRRLYLRKRTVTELDVSVTARLREVEHRASDPIAIVGMACRFPPGGVHNPGELWEFIVGGGDAVTEMPT<br/> DRGWLDLALFDDPDPQRHGTSYSRHGAFDGAADFDAFFFGISPREALAMPQQRQVLETTWELFENAGIDPHSLRG<br/> SDTGVFLGAAAYQGYGQDAVVPEDSEGYLLTGNSSAVVSGRVAYVVLGLEGPAVTVDTACSSSLVALHSACGSLRDGD<br/> CGLAVAGGVSVMAGPEVFTFESRQGGGLAVDGRCKAFSAEADGFGFAEGVAVVLLQRLSDARRAGRQVLGVVAGSAI<br/> NQDGASNGLAAPSGVAQQRVIRKAWARAGITGADVAVVEAHGTGTRLGDPVEASALLATYGKSRGSSGPVLLGSVK<br/> SNIGHAQAAAGVAGVIKVVLLGNRGLVPPMLCRGERSPLIEWSSGGVELAEAVSPWPPAADGVRRAVSAFVGS<br/> <b>GT</b><br/> <b>NAHVILEQAPAEADAHPAPEPAPGEDSHPTPETAPGEDAPRTAPEPARVWVPHGTRDRLAQAARLRTHLETREP</b><br/> <b>DARPADVGTWLAAGRAVFDHRAVVLGADRAELLRGLDVAAGTDPDAVADGAAQGDRAVVFVPGHGAQWPGMARR</b><br/> <b>LFDDFPVFRESVLQCADAFAEFVDSLLDVLDRDEEGAPPLHRVDVVQPALFTMMVSLAALWRSYGVPEPAVAVGHSQ</b><br/> <b>GEIAAAYVAGALDLRDAARIVATRGKAWTLTLAGTGMASVALPRAEAAERLRPFGRDLIAAVNDPRSVTVAGLDL</b><br/> <b>ALEEFLTGLETEGVRVRRVRQIVGAGHTAHVDALRQLIETLAPTAPRSAPIAFCSTVTGGLDLAGLDHYYWRN</b><br/> <b>ARRTVLFEQAVRTLAEQGYGPFLEISAHPMFTVAVQETLEDAVGAAVLATLRRDEGGPDRFLRAAAEAHTAGTV</b><br/> <b>DWRPAFAGAGARTVDLPNYPFEPQRYWLAPEVSDQLADSRVVDWRPLATTPVDLEGGFLVHGSAPESLTSAVEKA</b><br/> <b>GGRVVPVASADREALAAALREVPGEVAGVLSVHTGAATHLALHQSLEAGVRAPLWLVTSTRAVALGESEPVDEPEQA</b><br/> <b>MVWGLGRVMGLETPERWGLVDLPAEPAPGDGEAFVACLADGHEDQVAIRDHARYGRRLVRAPLGTRESSWEPAG</b></p>                                                                                                                                                                                                                                                                                                                                                                                                                                                                                                                                                                                                                                                                                                                                                               |

|                     |                                                                                                                                                                                                                                                                                                                                                                                                                                                                                                                                                                                                                                                                                                                                                                                                                                                                                                                                                                                                                                                                                                                                                                                                                                                                                                                                                                                                                                                                                                                                                                                                                                                                                                                                                                                                                                                                                                                                                                                                                |
|---------------------|----------------------------------------------------------------------------------------------------------------------------------------------------------------------------------------------------------------------------------------------------------------------------------------------------------------------------------------------------------------------------------------------------------------------------------------------------------------------------------------------------------------------------------------------------------------------------------------------------------------------------------------------------------------------------------------------------------------------------------------------------------------------------------------------------------------------------------------------------------------------------------------------------------------------------------------------------------------------------------------------------------------------------------------------------------------------------------------------------------------------------------------------------------------------------------------------------------------------------------------------------------------------------------------------------------------------------------------------------------------------------------------------------------------------------------------------------------------------------------------------------------------------------------------------------------------------------------------------------------------------------------------------------------------------------------------------------------------------------------------------------------------------------------------------------------------------------------------------------------------------------------------------------------------------------------------------------------------------------------------------------------------|
|                     | <p>TALVTGGTGALGGHVARHLARCGVEDLVLVSRRGVDAPGAAEAELELVALGAKTTITACDVADREQLSKLLEELRG<br/> QGRPVRTVVHTAGVPEsrplHEIGELESVCAAKVTGARLLDELCPDAETFVLFSSGAGVWGSANLGAYSAANAYLD<br/> ALAHRRRAEGRRAATSVAWGAWAGEGMATGDLEGLTRRGLRPMAPERAIRALHQALDNGDTCVSIADVDWERFVAVGF<br/> TAARPRPLLELVTAVGAVPAVQAAPAREMTSQELLEFTSHVAAI LGHSSPDVAVGQDPFTELGFDSLTAVGLR<br/> NQLQQATGLALPATLVFEHPTVRRRLADHIGQQLDSTGTPAREASSALRDGYRQAGVSGRVRSYLDLLAGLSDFREHF<br/> DGSDFSLDLVDMADGPGPEVTVICCAGTAAISGPHEFTRLAGALRGIAPVRAVPQPGYEEGEPLPSSMAA VAVQA<br/> DAVIRTQGDKPFVAVGHSAGALMAYALATELLDRGHP PRGVVLI DVYPPGHQDAMNAWLEELTATLFDRETVMDD<br/> TRLTALGAYDRLTGQWRPRETGLPTLLVSAGEPMGPWPDDSWKPTWPFHEHDTVAVPGDHFTMVQEHADA IARHIDA<br/> WLGGNSSSSVDKLAALAEH HHHHHH*</p>                                                                                                                                                                                                                                                                                                                                                                                                                                                                                                                                                                                                                                                                                                                                                                                                                                                                                                                                                                                                                                                                                                                                                                                                                                                                                        |
| <p><b>Leu-2</b></p> | <p>MSGDNGMTEEKLRRLKRTVTELDSTARLREVEHRASDPIAIVGMACRFPGGVHNPGLWEFIVGGGDAVTEMPT<br/> DRGWLDLALFDPDPQRHGTSYSRHGAFLDGAADFDAFFGISPREALAMPQQRQVLETTWELFENAGIDPHSLRG<br/> SDTGVLGAAYQGYGQDAVVPEDSEGYLLTGNSAVVSGRVAYVVLGLEGPAVTVDTACSSSLVALHSACGSLRDGD<br/> CGLAVAGGVSVMAGPEVTFEFSRQGLAVDGRCKAFSAEADGFGFAEGVAVVLLQRLSDARRAGRQVLGVVAGSAI<br/> NQDGASNGLAAPSGVAQQRVIRKAWARAGITGADVAVVEAHGTGTRLDGPVEASALLATYGKSRGSSGPVLLGSVK<br/> SNIGHAQAAAGVAGVIKVVGLNRLVPPMLCRGERSPLIEWSSGGVELAEAVSPWPPAADGVRRAVSAFVSGT<br/> NAHVLEEAPRAPAPPEHASDHVLALSARS DAALDALIERYAAATEQQQDVLASLCTAAAGRAHFERRIACV<br/> APSAPKMLELLRAARAGSNARGIARATLSSRRERRVAFVLSGFGSESVMGREL YETEPAFREAMDRCADLLAPHL<br/> PRRLTDVLYPARDAAAGAAASLDLSYAQPALFALEYCLAELWKS WGITPSAVVGHSLGECVAAACVAVGFLS DAL<br/> TLVAARGRIMESLAGEGETFLVSADEATVRRVIASDPVSI GINGPANIVI SGAPAGVSVVERLSQEGIEVKKLD<br/> VRAAHSPLMDPMLAEAFKVARSI RYARPTIDLVANLTGEVAGEE IATPEYWCRQIRETVRMSACLRTLHDALGFE<br/> VFLELGPSPALVWNGMQCVPKRSGAWIASLRPGRPDRAQILAALASLYANGVDVNWTSVAREEQRRRVDLPNYPFE<br/> PQRYWLAPEVSDQLADSR YRVDWRPLATTPVDLEGGFLVHGSAPESLTSAVEKAGGRVVPVASADREALAAALREV<br/> PGEVAVLSVHTGAATHLALHQS LGEAGVRAPLWLVT SRAVALGESEPVDPQAMVWGLGRVMGLET PERWGLVD<br/> LPAEPAPGDGEAFVACL GADGHEDQVAIRDHARYGRRLV RAPLGTRESSWE PAGTALVTGGTGALGGHVARHLAR<br/> CGVEDLVLVSRRGVDAPGAAEAELELVALGAKTTITACDVADREQLSKLLEELRGQRPVRTVVHTAGVPEsrplHE<br/> IGELESVCAAKVTGARLLDELCPDAETFVLFSSGAGVWGSANLGAYSAANAYLDALAHRRRAEGRRAATSVAWGAWA<br/> GEGMATGDLEGLTRRGLRPMAPERAIRALHQALDNGDTCVSIADVDWERFVAVGFTAARPRPLLELVTAVGAVPA<br/> VQAAPAREMTSQELLEFTSHVAAI LGHSSPDVAVGQDPFTELGFDSLTAVGLRNQLQQATGLALPATLVFEHPTV<br/> RRLADHIGQQLDSTGTPAREASSALRDGYRQAGVSGRVRSYLDLLAGLSDFREHFDGSDFSLDLVDMADGPGPEVTV<br/> ICCAGTAAISGPHEFTRLAGALRGIAPVRAVPQPGYEEGEPLPSSMAA VAVQADAVIRTQGDKPFVAVGHSAGAL<br/> MAYALATELLDRGHP PRGVVLI DVYPPGHQDAMNAWLEELTATLFDRETVMDDTRLTALGAYDRLTGQWRPRETG<br/> LPTLLVSAGEPMGPWPDDSWKPTWPFHEHDTVAVPGDHFTMVQEHADA IARHIDAWLGGGNSSSSVDKLAALAEH HHH<br/> HH*</p>                                           |
| <p><b>Div-6</b></p> | <p>MSGDNGMTEEKLRRLKRTVTELDSTARLREVEHRASDPIAIVGMACRFPGGVHNPGLWEFIVGGGDAVTEMPT<br/> DRGWLDLALFDPDPQRHGTSYSRHGAFLDGAADFDAFFGISPREALAMPQQRQVLETTWELFENAGIDPHSLRG<br/> SDTGVLGAAYQGYGQDAVVPEDSEGYLLTGNSAVVSGRVAYVVLGLEGPAVTVDTACSSSLVALHSACGSLRDGD<br/> CGLAVAGGVSVMAGPEVTFEFSRQGLAVDGRCKAFSAEADGFGFAEGVAVVLLQRLSDARRAGRQVLGVVAGSAI<br/> NQDGASNGLAAPSGVAQQRVIRKAWARAGITGADVAVVEAHGTGTRLDGPVEASALLATYGKSRGSSGPVLLGSVK<br/> SNIGHAQAAAGVAGVIKVVGLNRLVPPMLCRGERSPLIEWSSGGVELAEAVSPWPPAADGVRRAVSAFVSGT<br/> NAHVII EQAPPADPDAGDADALDPEAVGGGIVPLVVTGRGTAGRTARAAQLAAWLTDGPEQPVGDVARALIHNVAV<br/> LPDRAVVLVAGGGPGTPGAGEGAVS GAEGVGSAAANPPAASAVDGLVALAGDRAAAGVVRGDGPLLTGDVAVFPVGGQ<br/> GSQWLGMAELLASSVFAAAMAECDAALGDYVGVSVI DVIRQDPAAPDPNLI EVVQPSLFAVHVS LAALWQHVG<br/> RPAAVVGHSGQEI AAVVSGALSLSGARVIVARSALLAEELLGK GAMAWIGTSADDVEDRLAQWADRLSVAGRNS<br/> PRAVTVVGTEALHEL VAGCEADGIRTRIVGSSVASHCAQIEPLRDRLLAMFDEVTPRAARVPFYSSVTGTVIDTT<br/> GMDAEYWRNAREPVDLEAAVRALLADGYAFFVELSAHPVLTVPVQETA EAVGADVAAVGSLRRDDGGPRRFLTSM<br/> AEGFVRGLPVDWSVLF DAGRRRAHVDLPNYPFEPQRYWLAPEVSDQLADSR YRVDWRPLATTPVDLEGGFLVHGSAP<br/> ESLTSAVEKAGGRVVPVASADREALAAALREV PGEVAVLSVHTGAATHLALHQS LGEAGVRAPLWLVT SRAVALG<br/> ESEPVDPQAMVWGLGRVMGLET PERWGLVDLPAEPAPGDGEAFVACL GADGHEDQVAIRDHARYGRRLV RAPLGT<br/> RESSWE PAGTALVTGGTGALGGHVARHLARCGVEDLVLVSRRGVDAPGAAEAELELVALGAKTTITACDVADREQ<br/> LSKLEELRGQGRPVRTVVHTAGVPEsrplHEIGELESVCAAKVTGARLLDELCPDAETFVLFSSGAGVWGSANLG<br/> AYSAANAYLDALAHRRRAEGRRAATSVAWGAWAGEGMATGDLEGLTRRGLRPMAPERAIRALHQALDNGDTCVSIAD<br/> VDWERFVAVGFTAARPRPLLELVTAVGAVPAVQAAPAREMTSQELLEFTSHVAAI LGHSSPDVAVGQDPFTELGF<br/> FDSLTAVGLRNQLQQATGLALPATLVFEHPTVRRRLADHIGQQLDSTGTPAREASSALRDGYRQAGVSGRVRSYLDLL<br/> AGLSDFREHFDGSDFSLDLVDMADGPGPEVTVICCAGTAAISGPHEFTRLAGALRGIAPVRAVPQPGYEEGEPLP<br/> SMAA VAVQADAVIRTQGDKPFVAVGHSAGALMAYALATELLDRGHP PRGVVLI DVYPPGHQDAMNAWLEELTATL<br/> FDRETVMDDTRLTALGAYDRLTGQWRPRETGLPTLLVSAGEPMGPWPDDSWKPTWPFHEHDTVAVPGDHFTMVQEH<br/> ADAIARHIDAWLGGGNSSSSVDKLAALAEH HHHHHH*</p> |
| <p><b>Sal-1</b></p> | <p>MSGDNGMTEEKLRRLKRTVTELDSTARLREVEHRASDPIAIVGMACRFPGGVHNPGLWEFIVGGGDAVTEMPT<br/> DRGWLDLALFDPDPQRHGTSYSRHGAFLDGAADFDAFFGISPREALAMPQQRQVLETTWELFENAGIDPHSLRG<br/> SDTGVLGAAYQGYGQDAVVPEDSEGYLLTGNSAVVSGRVAYVVLGLEGPAVTVDTACSSSLVALHSACGSLRDGD<br/> CGLAVAGGVSVMAGPEVTFEFSRQGLAVDGRCKAFSAEADGFGFAEGVAVVLLQRLSDARRAGRQVLGVVAGSAI<br/> NQDGASNGLAAPSGVAQQRVIRKAWARAGITGADVAVVEAHGTGTRLDGPVEASALLATYGKSRGSSGPVLLGSVK<br/> SNIGHAQAAAGVAGVIKVVGLNRLVPPMLCRGERSPLIEWSSGGVELAEAVSPWPPAADGVRRAVSAFVSGT</p>                                                                                                                                                                                                                                                                                                                                                                                                                                                                                                                                                                                                                                                                                                                                                                                                                                                                                                                                                                                                                                                                                                                                                                                                                                                                                                                                                                                                                                                                                                             |

|               |                                                                                                                                                                                                                                                                                                                                                                                                                                                                                                                                                                                                                                                                                                                                                                                                                                                                                                                                                                                                                                                                                                                                                                                                                                                                                                                                                                                                                                                                                                                                                                                                                                                                                                                                                                                                                                                                                                                                                                       |
|---------------|-----------------------------------------------------------------------------------------------------------------------------------------------------------------------------------------------------------------------------------------------------------------------------------------------------------------------------------------------------------------------------------------------------------------------------------------------------------------------------------------------------------------------------------------------------------------------------------------------------------------------------------------------------------------------------------------------------------------------------------------------------------------------------------------------------------------------------------------------------------------------------------------------------------------------------------------------------------------------------------------------------------------------------------------------------------------------------------------------------------------------------------------------------------------------------------------------------------------------------------------------------------------------------------------------------------------------------------------------------------------------------------------------------------------------------------------------------------------------------------------------------------------------------------------------------------------------------------------------------------------------------------------------------------------------------------------------------------------------------------------------------------------------------------------------------------------------------------------------------------------------------------------------------------------------------------------------------------------------|
|               | <p>NAHVILEFPQAAIGPATARAEEITPLSLLPVTAHSAEALRDTCRELSNHVERNAAPWLPDLAYTLATRRTPLPHRIAF<br/> VVRDRDLDLGLAHI SAGRSYPGAVKGT VAGGGARRVALVFSGGGTHWAGMGRALMDWHAGFRASMHCECDVAVFREL<br/> IGWSVIDELSLPAERSRLDATDIQQVFLFTLQVSLARLWMELGIEPEAFVGHSIGEVAAVCVAGGLSVRDAARVTI<br/> ARSHLIQHRAAKAAMI AVQAGDEEIPFLAPYGGRRVAIAALNSPTSSAVSGPPEEIRALEVALNRAGISSRAVRVD<br/> RPGHSPGMDPLLSPLREALTNI EPRAFWARFHSTALDGAVDPPVNDYWAHNLNRQVRFAPTVAALADAGIDTFVE<br/> ISPHGTLRGAIEEITQAQGASVVVADSIRRGEDDNRCLNAAASLFVHGVPLSLETFLSSDAQVVDLPNYPFEPQR<br/> YWLAVEVSDQLADSRVYRVDWRPLATTPVDLEGGFLVHGSAPESLTSAVEKAGGRVVPVASADREALAAALREVPGE<br/> VAGVLSVHTGAATHLALHQS LG EAGVRAPLWLVT SRAVALGESEPVDPQAMVWGLGRVMGLET PERWGGVLVDLPA<br/> EPAPGDGEAFVACL GADGHEDQVAIRDHARYGRRLVRAPLGTRESSWE PAGTALVTGGTGALGGHVARHLARCVE<br/> DLVLSRRGVDAPGAAELEAEALVALGAKTTITACDVADREQLSKLLEELRGQGRPVRTVVHTAGVPESRPLHEIGE<br/> LESVCAAKVTGARLLDELCPDAETFVLFSSGAGVWGSANLGAISAANAYLDALAHRRRAEGRRAATSVAWGAWAGEG<br/> MATGDLLEGLTRRGLRPMAPERAIRALHQALDNGDTCVSIADVDWERFAVGFTAARPRPLLELVT PAVGAVPAVQA<br/> APAREMTSQELLEFTHSHVAAILGHSSPDAVGQDQPFTELGFDSLTA VGLRNQLQQATGLALPATLVFEHPTVRRRL<br/> ADHIGQQLDSGTPAREASSALRDGYRQAGVSGRVRSYLDLLAGLSDFREHFDGSDGFSLDLVDMDGPGEVTVICC<br/> AGTAAISGPHEFTRLGALRGIAPVRAVPQPGYEEGEP L PSSMAA VAAVQADAVIRTQGDKPFVAVGHSAGALMAY<br/> ALATELLDRGHPPRGVVLDVYPPGHQDAMNAWLEELTATLFDRETVMDDTRLTALGAYDRLTGQWRPRETGLPT<br/> LLVSAGEPMGPWPDDSWKPTWPF EHDTVAVPGDHFTMVQEHADA IARHIDAWLGGGNSSSVDKLAAALEHHHHHH*</p>                                                                                                                                                                                                                                                                                                                                                                                                                                                                                                   |
| <p>Sta-12</p> | <p>MSGDNGMTEEKLRRYLKRTVTELD SVTARLREVEHRASDP IAI VGMACRF PGGVHNPGELWEFIVGGGDAVTEMPT<br/> DRGWLDLDFDPPQRHGTYSYRHGAFLDGAADFDAFFGISPREALAMPQQRQVLETTWELFENAGIDPHSLRG<br/> SDTG VFLGAAAYQGYGQDAVVPEDSEGYLLTGNSSAVVSGRVAYVVLGLEGPAVTVDTACSSSLVALHSACGSLRDGD<br/> CGLAVAGGV SVMAGPEVFTEFSRQGLAVDGRCKAFSAEADGFGFAEGVAVVLLQRLSDARRAGRQVLGVVAGSAI<br/> NQDGASNGLAAPSGVAQQRVIRKAWARAGITGADVAVVEAHGTGTRLGDPVEASALLATYGKSRGSSGPVLLGSVK<br/> SNIGHAQAAAGVAGVIKVVGLNRLVPPMLCRGERSPLIEWSSGGVELAEAVSPWPPAADGVRRAGVSAFGVSGT<br/> NAHTILEQALPEPAAASPGTDGGSEVDLPWLLSARTPAALRAQARRLAAHLADADPAPAGHDVAHSLAATRSRFEHR<br/> AVLLGPDHQAQLTAFABGAPTGLVTGTAGRTGRVAVFLPGQGSQWPGMADRLLAESATFRNTLRCAQALEEHL<br/> WSVEDTLRGLPGAGNMERAEVIQPVLFATMVLAALWREHGVPEAVVGHSSQGEIAAAHLGALGSLDAARVVTHR<br/> SRLLSRVVGGGAVASVSLPAQEALARLERWGDALSIAAVNGVSSVSVAGDEAPLDEFLAELETEGVRCRKLRIKGA<br/> AHSAVVEPLREEALAVLAPVRPRASRI PFYSTVTGGLDTELD AEYWRNMRQTVQFAPATRALLADGFGVFVEEC<br/> SPPHALAGAVQETAEDAGASDPVLLASLRREEGGLERFSVSLAEAFVRGVGPSWASRGSSVVDLPNYPFEPQRYWLA<br/> PEVSDQLADSRVYRVDWRPLATTPVDLEGGFLVHGSAPESLTSAVEKAGGRVVPVASADREALAAALREVPGEVAGV<br/> LSVHTGAATHLALHQS LG EAGVRAPLWLVT SRAVALGESEPVDPQAMVWGLGRVMGLET PERWGGVLVDLPAEPAP<br/> GDGEAFVACL GADGHEDQVAIRDHARYGRRLVRAPLGTRESSWE PAGTALVTGGTGALGGHVARHLARCVEIDLVL<br/> VSRRGVDAPGAAELEAEALVALGAKTTITACDVADREQLSKLLEELRGQGRPVRTVVHTAGVPESRPLHEIGELESV<br/> CAAKVTGARLLDELCPDAETFVLFSSGAGVWGSANLGAISAANAYLDALAHRRRAEGRRAATSVAWGAWAGEGMATG<br/> DLEGLTRRGLRPMAPERAIRALHQALDNGDTCVSIADVDWERFAVGFTAARPRPLLELVT PAVGAVPAVQAAPAR<br/> EMTSQELLEFTHSHVAAILGHSSPDAVGQDQPFTELGFDSLTA VGLRNQLQQATGLALPATLVFEHPTVRRRLADHI<br/> GQQLDSGTPAREASSALRDGYRQAGVSGRVRSYLDLLAGLSDFREHFDGSDGFSLDLVDMDGPGEVTVICCAGTA<br/> AISGPHEFTRLGALRGIAPVRAVPQPGYEEGEP L PSSMAA VAAVQADAVIRTQGDKPFVAVGHSAGALMAYALAT<br/> ELLDRGHPPRGVVLDVYPPGHQDAMNAWLEELTATLFDRETVMDDTRLTALGAYDRLTGQWRPRETGLPTLLVS<br/> AGEPMGPWPDDSWKPTWPF EHDTVAVPGDHFTMVQEHADA IARHIDAWLGGGNSSSVDKLAAALEHHHHHH*</p> |
| <p>Spl-3</p>  | <p>MSGDNGMTEEKLRRYLKRTVTELD SVTARLREVEHRASDP IAI VGMACRF PGGVHNPGELWEFIVGGGDAVTEMPT<br/> DRGWLDLDFDPPQRHGTYSYRHGAFLDGAADFDAFFGISPREALAMPQQRQVLETTWELFENAGIDPHSLRG<br/> SDTG VFLGAAAYQGYGQDAVVPEDSEGYLLTGNSSAVVSGRVAYVVLGLEGPAVTVDTACSSSLVALHSACGSLRDGD<br/> CGLAVAGGV SVMAGPEVFTEFSRQGLAVDGRCKAFSAEADGFGFAEGVAVVLLQRLSDARRAGRQVLGVVAGSAI<br/> NQDGASNGLAAPSGVAQQRVIRKAWARAGITGADVAVVEAHGTGTRLGDPVEASALLATYGKSRGSSGPVLLGSVK<br/> SNIGHAQAAAGVAGVIKVVGLNRLVPPMLCRGERSPLIEWSSGGVELAEAVSPWPPAADGVRRAGVSAFGVSGT<br/> NAHVILEEAPPVAPAPRPPSEEGRRVLVLPVSARTSGALRGQAHALARRLEERPGLRLDDVAGALRADRPALRHRLT<br/> VSASSVPEAVEALRAAVPAVPPVPDEPKVAFLLPGGGTQYVGMGSGLYRENDVYRDTVDRCAAVLRPALGSDLRT<br/> ALFEEVEPGSTA AFMALFVTEYALARTLMEEGVRPDALIGHSLGEYTAACLAGVMEIDEALPVVAERIRLIASSGG<br/> ATVGVAACADTVLPLLGEGLS LAAVNSPVACTVAGD TDAVDRLEAELTRRGVPPFRRLRMPAAAHSHVLDPILESFA<br/> GHLR TLTLRPPRI PYVTNVTGDWATDAQATDVGHWVDHTRTRTVRFADGIAALWERERPVLVEIGPGDSLTKLARAR<br/> LDGEGPVTVTMRHAKAQADGFVLAELGRLWSAGVDAALPHVPRPPRAGRVDLPNYPFEPQRYWLAVEVSDQL<br/> ADSRVYRVDWRPLATTPVDLEGGFLVHGSAPESLTSAVEKAGGRVVPVASADREALAAALREVPGEVAGVLSVHTGA<br/> ATHLALHQS LG EAGVRAPLWLVT SRAVALGESEPVDPQAMVWGLGRVMGLET PERWGGVLVDLPAEPAPGDGEAFV<br/> ACLGADGHEDQVAIRDHARYGRRLVRAPLGTRESSWE PAGTALVTGGTGALGGHVARHLARCVEIDLVLSRRGVD<br/> APGAAELEAEALVALGAKTTITACDVADREQLSKLLEELRGQGRPVRTVVHTAGVPESRPLHEIGELESVCAAKVTG<br/> ARLLDELCPDAETFVLFSSGAGVWGSANLGAISAANAYLDALAHRRRAEGRRAATSVAWGAWAGEGMATGDLLEGLTR<br/> RGLRPMAPERAIRALHQALDNGDTCVSIADVDWERFAVGFTAARPRPLLELVT PAVGAVPAVQAAPAREMTSQELE<br/> LEFTHSHVAAILGHSSPDAVGQDQPFTELGFDSLTA VGLRNQLQQATGLALPATLVFEHPTVRRRLADHIGQQLDSG<br/> TPAREASSALRDGYRQAGVSGRVRSYLDLLAGLSDFREHFDGSDGFSLDLVDMDGPGEVTVICCAGTAAISGPHE<br/> FTRLGALRGIAPVRAVPQPGYEEGEP L PSSMAA VAAVQADAVIRTQGDKPFVAVGHSAGALMAYALATELLDRGH<br/> PPRGVVLDVYPPGHQDAMNAWLEELTATLFDRETVMDDTRLTALGAYDRLTGQWRPRETGLPTLLVSAGEPMGP<br/> WPDDSWKPTWPF EHDTVAVPGDHFTMVQEHADA IARHIDAWLGGGNSSSVDKLAAALEHHHHHH*</p>  |

|              |                                                                                                                                                                                                                                                                                                                                                                                                                                                                                                                                                                                                                                                                                                                                                                                                                                                                                                                                                                                                                                                                                                                                                                                                                                                                                                                                                                                                                                                                                                                                                                                                                                                                                                                                                                                                                                                                                                                                                  |
|--------------|--------------------------------------------------------------------------------------------------------------------------------------------------------------------------------------------------------------------------------------------------------------------------------------------------------------------------------------------------------------------------------------------------------------------------------------------------------------------------------------------------------------------------------------------------------------------------------------------------------------------------------------------------------------------------------------------------------------------------------------------------------------------------------------------------------------------------------------------------------------------------------------------------------------------------------------------------------------------------------------------------------------------------------------------------------------------------------------------------------------------------------------------------------------------------------------------------------------------------------------------------------------------------------------------------------------------------------------------------------------------------------------------------------------------------------------------------------------------------------------------------------------------------------------------------------------------------------------------------------------------------------------------------------------------------------------------------------------------------------------------------------------------------------------------------------------------------------------------------------------------------------------------------------------------------------------------------|
| <p>Las-1</p> | <p>MSGDNGMTEEKLRRLKRTVTELDVSVTARLREVEHRASDPIAIVGMACRFPPGGVHNPGELWEFIVGGGDAVTEMPT<br/> DRGWLDLALFDPDPQRHGTSYSRHGAFLDGAADFDAFFFGISPREALAMPQQRQVLETTWELFENAGIDPHSLRG<br/> SDTGVLGAAYQGYGQDAVVPEDSEGYLLTGNSSAVVSGRVAYVVLGLEGPAVTVDTACSSSLVALHSACGSLRDGD<br/> CGLAVAGGVSVMAGPEVFTEFSRQGGGLAVDGRCKAFSAEADGFGFAEGVAVVLLQRLSDARRAGRQVLGVVAGSAI<br/> NQDGASNGLAAPSGVAQQRVIRKAWARAGITGADVAVVEAHGTGTRLDGPVEASALLATYGKSRGSSGPVLLGSVK<br/> SNIGHAQAAAGVAGVIKVVLLGNRGLVPPMLCRGERSPLIEWSSGGVELAEAVSPWPPAADGVRRAAGVSFAFGVSGT<br/> NAHVILEDVLDQEPSSPEDDASATPLVLSADDPQALRAQAARLHFSFVEQRPDIPLSDVRFTHLHGREALDQRAAV<br/> VGHDRADVLAALADLAGEAGAGVLTGGVGGVGVVVFVFPQGSQWPGMGRELLDTSFVFATHIAECEAALTPYVD<br/> WSLTDVLRQGEPLDRIEILQPVLFALMVSLARLWQHGGIHPDAVTGHSQGEIAAAHLAGALTDDATRIIVLRSQ<br/> FADHLTGHGAIASLTLPATQVTHQLAQYDGRLLIAGINSPTTCTVAGPHTDLTTLTHWARQQGARARIIDTTVASH<br/> SPHVEPLHDDLILHLADISPOAGTIPIYSTVTTPEIDGTQLTAEYWYDNCRHPVRFHDTLHLLTHGHTHYLEIS<br/> HPVLIIPAITETHPTATTIPTLHRNQGTDTDLHTSLAHVAHTGLPTTWTRPRSGDTHIVDLPNYPFEPQRYWLAPEV<br/> SDQLADSRVVDWRPLATTPVDLEGGFLVHGSAPESLTSAVEKAGGRVVPVASADREALAAALREVPGEVAGVLSV<br/> HTGAATHLALHQLSLEAGVRAPLWLVTSRAVALGESEFVDPEQAMVWGLGRVMGLETPERWGGVLVLPAPGPDG<br/> EAFVACLADGHEDQVAIRDHARYGRRLVRAPLGTRESSWEPAGTALVTGGTGALGGHVARHLARCGVEDLVLSR<br/> RGVDAPGAAELEAEALVALGAKTTITACDVADREQLSKLLEELRGQRPVRTVVHTAGVPESRPLHEIGELESVCAA<br/> KVTGARLLDELCPDAETFVLFSSGAGVWGSANLGAUSAANAYLDALAHRRRAEGRRAATSVAWGAWAGEGMATGDLE<br/> GLTRGLRPMAPERAIRALHQAALDNGDTCVSIADVDWERFVAVGFTAARPRPLDELVTAVGAVPAVQAAPAREMT<br/> SQELLEFTSHVAAIILGHSSPDVAVGQDPFTELGFDSLTAVGLRNQLQATGLALPATLVFEHPTVRRRLADHIGQQ<br/> LDSGTPAREASSALRDGYRQAGVSGRVRSYLDLLAGLSDFREHFDDGSDGFSLDLVDMDGPGEVTVICAGTAAIS<br/> GPHEFTRLAGALRGIAPVRAVPQPGYEEGEPLPSSMAAVALVQADAVIRTQGDKPFVAVAGHSAGALMAYALATELL<br/> DRGHPPRGVVLDVYPPGHQDAMNAWLEELTATLFDRETVMDDTRLTALGAYDRLTGQWRPRETGLPTLLVSAGE<br/> PMGPWPDDSWKPTWPFHDTVAVPGDHFTMVQEHADAIAARHIDAWLGGGNSSSVDKLAAALEHHHHHHH*</p> |
| <p>506-4</p> | <p>MSGDNGMTEEKLRRLKRTVTELDVSVTARLREVEHRASDPIAIVGMACRFPPGGVHNPGELWEFIVGGGDAVTEMPT<br/> DRGWLDLALFDPDPQRHGTSYSRHGAFLDGAADFDAFFFGISPREALAMPQQRQVLETTWELFENAGIDPHSLRG<br/> SDTGVLGAAYQGYGQDAVVPEDSEGYLLTGNSSAVVSGRVAYVVLGLEGPAVTVDTACSSSLVALHSACGSLRDGD<br/> CGLAVAGGVSVMAGPEVFTEFSRQGGGLAVDGRCKAFSAEADGFGFAEGVAVVLLQRLSDARRAGRQVLGVVAGSAI<br/> NQDGASNGLAAPSGVAQQRVIRKAWARAGITGADVAVVEAHGTGTRLDGPVEASALLATYGKSRGSSGPVLLGSVK<br/> SNIGHAQAAAGVAGVIKVVLLGNRGLVPPMLCRGERSPLIEWSSGGVELAEAVSPWPPAADGVRRAAGVSFAFGVSGT<br/> NAHVILEAPAAPDPSAASPSVAPREPLFTERTPLVVSARTPEAVEGQIQRLRAHLAEHPGDDPRTVAALFSTR<br/> TEFPHRAVLHLEGAVTGTALTRPRTVFVFPQGSQWLGMQKLMASPVFAARMRECADALAEHTGRDLRIAMLEDP<br/> AVKSRVDVVHPVCWAVMMSLAAVWEAAGVRPDAVIGHSQGEIAAACVAGAITLEDGARLVALRSALLRELAGHGA<br/> MGSIAFPAADVEAAAAQVDNVWVAGRNGTGTTIVSGRPDAVETLIARYEARGVVWTRLVVDPCPTHFPVDPLYDEF<br/> QRIAAATTSRTPRIPIWFSTADERWIDSPLDDEYWFNRNRPVGFAAAVALAAREPGDVFVEVSAHPVLLPAINGTT<br/> VGTLRGGGADQVVDLAKAYTAGVAVDWPTVVAAPGTAHDTTRTASGPVPGPAVDLPNYPFEPQRYWLAPEVSDQ<br/> LADSRVVDWRPLATTPVDLEGGFLVHGSAPESLTSAVEKAGGRVVPVASADREALAAALREVPGEVAGVLSVHTG<br/> AATHLALHQLSLEAGVRAPLWLVTSRAVALGESEFVDPEQAMVWGLGRVMGLETPERWGGVLVLPAPGPDGEAF<br/> VACLADGHEDQVAIRDHARYGRRLVRAPLGTRESSWEPAGTALVTGGTGALGGHVARHLARCGVEDLVLSRRGV<br/> DAPGAAELEAEALVALGAKTTITACDVADREQLSKLLEELRGQRPVRTVVHTAGVPESRPLHEIGELESVCAAKVT<br/> GARLLDELCPDAETFVLFSSGAGVWGSANLGAUSAANAYLDALAHRRRAEGRRAATSVAWGAWAGEGMATGDLEGLT<br/> RRGLRPMAPERAIRALHQAALDNGDTCVSIADVDWERFVAVGFTAARPRPLDELVTAVGAVPAVQAAPAREMTS<br/> QELLEFTSHVAAIILGHSSPDVAVGQDPFTELGFDSLTAVGLRNQLQATGLALPATLVFEHPTVRRRLADHIGQQ<br/> LDSGTPAREASSALRDGYRQAGVSGRVRSYLDLLAGLSDFREHFDDGSDGFSLDLVDMDGPGEVTVICAGTAAIS<br/> GPHEFTRLAGALRGIAPVRAVPQPGYEEGEPLPSSMAAVALVQADAVIRTQGDKPFVAVAGHSAGALMAYALATELL<br/> DRGHPPRGVVLDVYPPGHQDAMNAWLEELTATLFDRETVMDDTRLTALGAYDRLTGQWRPRETGLPTLLVSAGE<br/> PMGPWPDDSWKPTWPFHDTVAVPGDHFTMVQEHADAIAARHIDAWLGGGNSSSVDKLAAALEHHHHHHH*</p>      |
| <p>520-4</p> | <p>MSGDNGMTEEKLRRLKRTVTELDVSVTARLREVEHRASDPIAIVGMACRFPPGGVHNPGELWEFIVGGGDAVTEMPT<br/> DRGWLDLALFDPDPQRHGTSYSRHGAFLDGAADFDAFFFGISPREALAMPQQRQVLETTWELFENAGIDPHSLRG<br/> SDTGVLGAAYQGYGQDAVVPEDSEGYLLTGNSSAVVSGRVAYVVLGLEGPAVTVDTACSSSLVALHSACGSLRDGD<br/> CGLAVAGGVSVMAGPEVFTEFSRQGGGLAVDGRCKAFSAEADGFGFAEGVAVVLLQRLSDARRAGRQVLGVVAGSAI<br/> NQDGASNGLAAPSGVAQQRVIRKAWARAGITGADVAVVEAHGTGTRLDGPVEASALLATYGKSRGSSGPVLLGSVK<br/> SNIGHAQAAAGVAGVIKVVLLGNRGLVPPMLCRGERSPLIEWSSGGVELAEAVSPWPPAADGVRRAAGVSFAFGVSGT<br/> NAHVILLEAHPAGEPPAEPEPSASKPGEPLIATPLTLPVVSARTATALDQVRRRLREHLAARPGHDPRAIAAGLLARR<br/> TTFPHRAVLLDDDDVVTGTALTEPRTVVFVFPQGPQWRGMGVELMAASPVFAARMRQCADALIPTHGWDP IAMLDDP<br/> EVTRRVDDVVHPVCWAVMMSLAAVWEAAGVRPDAVIGHSQGEIAAACVAGALTLEDGARLVALRSALLRELAGRGA<br/> MGSVALPAADVEADAARIDGVVWVAGRNGATTTTAVGRPDAVETLIADYEARGVWVRRIAVDCPTHFPVDPLYDEL<br/> QRIVADTTTSRTPEIPIWFSTADERWIDAPLDDEYWFNRMRHPVGFATAVTAAREPGDVFVEVSAHPVLLPAIDGAT<br/> VATLRRGGGVHRLLTALAEAHHTGVPVDWAAVVPATATAVDLPNYPFEPQRYWLAPEVSDQLADSRVVDWRPLAT<br/> TPVDLEGGFLVHGSAPESLTSAVEKAGGRVVPVASADREALAAALREVPGEVAGVLSVHTGAATHLALHQLSLEAG<br/> VRAPLWLVTSRAVALGESEFVDPEQAMVWGLGRVMGLETPERWGGVLVLPAPGPDGEAFVACLADGHEDQVAI<br/> RDHARYGRRLVRAPLGTRESSWEPAGTALVTGGTGALGGHVARHLARCGVEDLVLSRRGVDPGAAELEAEALVAL<br/> GAKTTITACDVADREQLSKLLEELRGQRPVRTVVHTAGVPESRPLHEIGELESVCAAKVTGARLLDELCPDAETF<br/> VLFSSGAGVWGSANLGAUSAANAYLDALAHRRRAEGRRAATSVAWGAWAGEGMATGDLEGLTRRGLRPMAPERAIRA</p>                                                                                                                                                                                                                                                                                                                                                                                                                                                                                           |



|                |                                                                                                                                                                                                                                                                                                                                                                                                                                                                                                                                                                                                                                                                                                                                                                                                                                                                                                                                                                                                                                                                                                                                                                                                                                                                                                                                                                                                                                                                                                                                                                                                                                                                                                                                                                                                                                      |
|----------------|--------------------------------------------------------------------------------------------------------------------------------------------------------------------------------------------------------------------------------------------------------------------------------------------------------------------------------------------------------------------------------------------------------------------------------------------------------------------------------------------------------------------------------------------------------------------------------------------------------------------------------------------------------------------------------------------------------------------------------------------------------------------------------------------------------------------------------------------------------------------------------------------------------------------------------------------------------------------------------------------------------------------------------------------------------------------------------------------------------------------------------------------------------------------------------------------------------------------------------------------------------------------------------------------------------------------------------------------------------------------------------------------------------------------------------------------------------------------------------------------------------------------------------------------------------------------------------------------------------------------------------------------------------------------------------------------------------------------------------------------------------------------------------------------------------------------------------------|
|                | <p>LHQALDNGDTCVSIADVDWERFVAVGFTAARPRPLLELVTAVGAVPAVQAAPAREMTSQELLEFTSHVAAIILGHSSPDVAVGQDQPFTELGFDSLTAVGLRNQLQQATGLALPATLVFEHPTVRRRLADHIGQQLDSGTPAREASSALRDGYRQAGVSGRVSRYLDDLGLSDFREHFDFGSDGFSLDLVDMDAGPGEVTVICAGTAAISGPHEFTRLGALRGIAPVRAVPQPGYEEGEPLPSSMAA VAAVQADAVIRTQGDKPFVAVGHSAGALMAYALATELDRGHPPRGVVLIDVYPPGHQDAMNAWLEELTATLFDRETVMDDTRLTALGAYDRLTGQWRPRETGLPTLLVSAGEPMGPWPDDSWKPTWPFHDTVAVPGDHFMTVQEHADAIARHIDAWLGGGNSSSVDKLAALAEHHHHHHH*</p>                                                                                                                                                                                                                                                                                                                                                                                                                                                                                                                                                                                                                                                                                                                                                                                                                                                                                                                                                                                                                                                                                                                                                                                                                                                                                                                                                                                 |
| <p>506-4_2</p> | <p>MSGDNGMTEEKLRRLKRTVTELDVSVARLREVEHRASDPIAIVGMACRFPPGGVHNPGLWEFIVGGGDAVTEMPTDRGWLDLALFDPPQRHGTSYSRHGAFLDGAADFDAFFGISPREALAMPQQRQVLETTWELFENAGIDPHSLRGSDTGVFLGAAAYQGYGQDAVVPEDSEGYLLTGNSSAVVSGRVAYVLGLEGPVAVTDTACSSSLVALHSACGSLRDGDCGLAVAGGVSVMAGPEVTFEFSRQGLAVDGRCKAFSAEADGFGFAEGVAVVLLQRLSDARRAGRQVLGVVAGSAI NQDGASNGLAAPSGVAQQRVIRKAWARAGITGADVAVVEAHGTGTRLDGPVEASALLATYGKSRGSSGPVLLGSVK SNIGHAQAAAGVAGVIKVVLLGNRGLVPPMLCRGERSPLIEWSSGGVELAEAVSPWPPAADGVRRAGVSAFGVSGT NAHVILEAHAPEPPALDSPVVEPSASLFATELTPLPVSARTSEAVDQGVQRLREHLATHPGDDPRVAALLATR TDFPHRAVLLGDGVVTGTALTAPRTVFVFPQGGSQWLGMGRKLMAESPVFAARMRQCADALAEHTGRDLIAMLDDP AVKSRVDVVHPVCWAVMVSLAAVWEAAGVRPDAVIGHSGQEI AAACVAGAI SLEDGARLVALRSALLVRELGRGA MGSIAFAAADVEAAAAARDIGVWVAGRNGTATTIVSGRPDAVETLIADYETRGVWVTRLVVDPCPTHFPFVDPYDEL QRIVAATTSRAPEI PWFSTADERWIDAPLDDEYWFNRNPNVGF AAAVAAAREPGDTVFIEVSAHPVLLPAINGTT VGTLLRRGGADRLLDSLAKAHTVGVAVDWPVVAATGA AHTARTADGAATGTAVDLPNYPFEPQRYWLAPEVSDQ LADSRVVDWRPLATTPVDLEGGFLVHGSAPESLTSAVEKAGGRVVPVADREALAAALREVPGEVAGVLSVHTG AATHLALHQSLGEAGVRAPLWLVTSTRAVALGESEPVDEQAMVWGLGRVMGLETPERWGGLVDLPAEPAPGDGEAF VACLGADGHEDQVAIRDHARYGRRLVRAPLGTRESSWEPAGTALVTGGTGALGGHVARHLARCGVEDLVLSRRGV DAPGAAELEAEELVALGAKTTITACDVADREQLSKLLEELRGQGRPVRTVVHTAGVPESRPLHEIGELSVCAAKVT GARLLDELCPDAETVFLFSSGAGVWGSANLGA YSAANAYLDALAHRRRAEGRATSVAWGAWAGEGMATGDLEGLT RRGLRPMAPERAIRALHQALDNGDTCVSIADVDWERFVAVGFTAARPRPLLELVTAVGAVPAVQAAPAREMTSQELLEFTSHVAAIILGHSSPDVAVGQDQPFTELGFDSLTAVGLRNQLQQATGLALPATLVFEHPTVRRRLADHIGQQLDS GTPAREASSALRDGYRQAGVSGRVSRYLDDLGLSDFREHFDFGSDGFSLDLVDMDAGPGEVTVICAGTAAISGPH EFTRLGALRGIAPVRAVPQPGYEEGEPLPSSMAA VAAVQADAVIRTQGDKPFVAVGHSAGALMAYALATELDRG HPPRGVVLIDVYPPGHQDAMNAWLEELTATLFDRETVMDDTRLTALGAYDRLTGQWRPRETGLPTLLVSAGEPMG PWPDDSWKPTWPFHDTVAVPGDHFMTVQEHADAIARHIDAWLGGGNSSSVDKLAALAEHHHHHHH*</p>             |
| <p>Thu-11</p>  | <p>MSGDNGMTEEKLRRLKRTVTELDVSVARLREVEHRASDPIAIVGMACRFPPGGVHNPGLWEFIVGGGDAVTEMPTDRGWLDLALFDPPQRHGTSYSRHGAFLDGAADFDAFFGISPREALAMPQQRQVLETTWELFENAGIDPHSLRGSDTGVFLGAAAYQGYGQDAVVPEDSEGYLLTGNSSAVVSGRVAYVLGLEGPVAVTDTACSSSLVALHSACGSLRDGDCGLAVAGGVSVMAGPEVTFEFSRQGLAVDGRCKAFSAEADGFGFAEGVAVVLLQRLSDARRAGRQVLGVVAGSAI NQDGASNGLAAPSGVAQQRVIRKAWARAGITGADVAVVEAHGTGTRLDGPVEASALLATYGKSRGSSGPVLLGSVK SNIGHAQAAAGVAGVIKVVLLGNRGLVPPMLCRGERSPLIEWSSGGVELAEAVSPWPPAADGVRRAGVSAFGVSGT NAHVLLERAPEPAATAPRAAAA PATWLPVLVSGRTGKALQAQAAKLAHLDSHPDLALADLACSLAGTRTHFARRA AVVARDRAALLDALDALAQGSAAPGVVLGEARAQGVVVFVFPQGSSQWPHMAKALLESSDVFRERIEACARALERH VDWSPLAVLRGDEGAPSLERIDVMQPLLFVAVMVSLSALWRSMGVEPDAVIGNSQGEIAAACVAGALSDDAAMVVA RRSRLTRLVGGGAMI VVDLPAELGERLARWGERLAI AAVNSPRSTVVAGEKDAVEELLRELPQAVVARRVRAD GATHCAQVEVLRREEVLDRLAGIEPRSSSTLPLYSTVTGDRLDGSELGTAYWYRNMRQPVRLLDAVQRLLADGHRFFV EVSPHPLSLLALRETFATGVPAAVVGSLLRDEGLRRFLLSLSDLWAQGFPLDWARVLEPGRVLDLPNYPFEPQR YWLAPEVSDQLADSRVVDWRPLATTPVDLEGGFLVHGSAPESLTSAVEKAGGRVVPVADREALAAALREVPGE VAGVLSVHTGAATHLALHQSLGEAGVRAPLWLVTSTRAVALGESEPVDEQAMVWGLGRVMGLETPERWGGLVDLPA EPAPGDGEAFVACLGADGHEDQVAIRDHARYGRRLVRAPLGTRESSWEPAGTALVTGGTGALGGHVARHLARCGVE DLVLSRRGV DAPGAAELEAEELVALGAKTTITACDVADREQLSKLLEELRGQGRPVRTVVHTAGVPESRPLHEIGEL SVCAAKVTGARLLDELCPDAETVFLFSSGAGVWGSANLGA YSAANAYLDALAHRRRAEGRATSVAWGAWAGEG MATGDLEGLTRRGLRPMAPERAIRALHQALDNGDTCVSIADVDWERFVAVGFTAARPRPLLELVTAVGAVPAVQA APAREMTSQELLEFTSHVAAIILGHSSPDVAVGQDQPFTELGFDSLTAVGLRNQLQQATGLALPATLVFEHPTVRRRL ADHIGQQLDSGTPAREASSALRDGYRQAGVSGRVSRYLDDLGLSDFREHFDFGSDGFSLDLVDMDAGPGEVTVIC AGTAAISGPHEFTRLGALRGIAPVRAVPQPGYEEGEPLPSSMAA VAAVQADAVIRTQGDKPFVAVGHSAGALMAY ALATELDRGHPPRGVVLIDVYPPGHQDAMNAWLEELTATLFDRETVMDDTRLTALGAYDRLTGQWRPRETGLPT LLVSAGEPMGPWPDDSWKPTWPFHDTVAVPGDHFMTVQEHADAIARHIDAWLGGGNSSSVDKLAALAEHHHHHHH*</p> |

**Table S2.** Plasmids and strains used in this study.

| Plasmids              | Summary                                                                                                                                         | Source of references |
|-----------------------|-------------------------------------------------------------------------------------------------------------------------------------------------|----------------------|
| pSY121 (JPUB_005999)  | DEBS M6+TE-His (= WT),<br>KanR                                                                                                                  | 4                    |
| pSY122 (JPUB_006001)  | AT-exchanged DEBS M6+TE,<br>AT from module 4 of the<br>epothilone PKS (= Epo-4),<br>KanR                                                        | 4                    |
| pSY150 (JPUB_020896)  | AT-exchanged DEBS M6+TE,<br>AT from module 5 of the<br>niddamycin PKS <sup>5</sup> (= Nid-5),<br>KanR                                           | This study           |
| pSY151 (JPUB_020898)  | AT-exchanged DEBS M6+TE,<br>AT from module 1 of the<br>lasalocid PKS <sup>6</sup> , KanR                                                        | This study           |
| pSY152 (JPUB_020900)  | AT-exchanged DEBS M6+TE,<br>AT from module 4 of the<br>FK506 PKS ( <i>Streptomyces</i> sp.<br>KCTC 11604BP) <sup>7</sup> , KanR                 | This study           |
| pSY153 (JPUB_020902)  | AT-exchanged DEBS M6+TE,<br>AT from module 4 of the<br>FK520 PKS <sup>7</sup> , KanR                                                            | This study           |
| pSY154 (JPUB_020904)  | AT-exchanged DEBS M6+TE,<br>AT from module 4 of the<br>FK506 PKS ( <i>Streptomyces</i><br><i>kanamyceticus</i> KCTC9225) <sup>7</sup> ,<br>KanR | This study           |
| pSY155 (JPUB_020906)  | AT-exchanged DEBS M6+TE,<br>AT from module 11 of the<br>thuggacin PKS <sup>8</sup> , KanR                                                       | This study           |
| pSY156 (JPUB_020908)  | AT-exchanged DEBS M6+TE,<br>AT from module 8 of the<br>ansalactam PKS <sup>9</sup> (= Ans-8),<br>KanR                                           | This study           |
| pSY157 (JPUB_0209010) | AT-exchanged DEBS M6+TE,<br>AT from module 13 of the<br>sanglifehrin PKS <sup>10</sup> (= San-13),<br>KanR                                      | This study           |
| pSY158 (JPUB_020912)  | AT-exchanged DEBS M6+TE,<br>AT from module 2 of the<br>leupyrrin PKS <sup>11</sup> (= Leu-2),<br>KanR                                           | This study           |

|                      |                                                                                                              |            |
|----------------------|--------------------------------------------------------------------------------------------------------------|------------|
| pSY159 (JPUB_020914) | AT-exchanged DEBS M6+TE,<br>AT from module 6 of the<br>divergolide PKS <sup>12</sup> (= Div-6),<br>KanR      | This study |
| pSY160 (JPUB_020916) | AT-exchanged DEBS M6+TE,<br>AT from module 4 of the<br>divergolide PKS <sup>12</sup> (= Div-4),<br>KanR      | This study |
| pSY161 (JPUB_020918) | AT-exchanged DEBS M6+TE,<br>AT from module 1 of the<br>salinosporamide PKS <sup>13</sup> (= Sal-<br>1), KanR | This study |
| pSY162 (JPUB_020920) | AT-exchanged DEBS M6+TE,<br>AT from module 5 of the<br>monensin PKS <sup>14</sup> (= Mon-5),<br>KanR         | This study |
| pSY164 (JPUB_020922) | AT-exchanged DEBS M6+TE,<br>AT from module 12 of the<br>stambomycin PKS <sup>15</sup> (= Sta-<br>12), KanR   | This study |
| pSY165 (JPUB_020924) | AT-exchanged DEBS M6+TE,<br>AT from module 4 of the<br>reveromycin PKS <sup>16</sup> (= Rev-4),<br>KanR      | This study |
| pSY166 (JPUB_020926) | AT-exchanged DEBS M6+TE,<br>AT from module 3 of the<br>splenocin PKS <sup>17</sup> (= Spl-3),<br>KanR        | This study |
| pEE1 (JPUB_020934)   | WT, A162W, KanR                                                                                              | This study |
| pEE2 (JPUB_020929)   | Epo-4, A162W, KanR                                                                                           | This study |
| pEE3 (JPUB_020931)   | Rev-4, A162W, KanR                                                                                           | This study |
| pLK54 (JPUB_020894)  | MatB T207G/M306I, KanR                                                                                       | 18         |

| Strains                                        | Summary                                                                                  | Source of references |
|------------------------------------------------|------------------------------------------------------------------------------------------|----------------------|
| <i>E. coli</i> DH10B + pSY121<br>(JPUB_005998) | Successfully produced WT<br>when <i>E. coli</i> K207-3 was<br>transformed with pSY121    | 4                    |
| <i>E. coli</i> DH10B + pSY122<br>(JPUB_006000) | Successfully produced Epo-4<br>when <i>E. coli</i> K207-3 was<br>transformed with pSY122 | 4                    |
| <i>E. coli</i> DH10B + pSY150<br>(JPUB_020895) | Successfully produced Nid-5<br>when <i>E. coli</i> K207-3 was<br>transformed with pSY150 | This study           |

|                                             |                                                                                     |            |
|---------------------------------------------|-------------------------------------------------------------------------------------|------------|
| <i>E. coli</i> DH10B + pSY151 (JPUB_020897) | Protein production was not successful.                                              | This study |
| <i>E. coli</i> DH10B + pSY152 (JPUB_020899) | Protein production was not successful.                                              | This study |
| <i>E. coli</i> DH10B + pSY153 (JPUB_020901) | Protein production was not successful.                                              | This study |
| <i>E. coli</i> DH10B + pSY154 (JPUB_020903) | Protein production was not successful.                                              | This study |
| <i>E. coli</i> DH10B + pSY155 (JPUB_020905) | Protein production was not successful.                                              | This study |
| <i>E. coli</i> DH10B + pSY156 (JPUB_020907) | Successfully produced Ans-8 when <i>E. coli</i> K207-3 was transformed with pSY156  | This study |
| <i>E. coli</i> DH10B + pSY157 (JPUB_020909) | Successfully produced San-13 when <i>E. coli</i> K207-3 was transformed with pSY157 | This study |
| <i>E. coli</i> DH10B + pSY158 (JPUB_020911) | Successfully produced Leu-2 when <i>E. coli</i> K207-3 was transformed with pSY158  | This study |
| <i>E. coli</i> DH10B + pSY159 (JPUB_020913) | Successfully produced Div-6 when <i>E. coli</i> K207-3 was transformed with pSY159  | This study |
| <i>E. coli</i> DH10B + pSY160 (JPUB_020915) | Successfully produced Div-4 when <i>E. coli</i> K207-3 was transformed with pSY160  | This study |
| <i>E. coli</i> DH10B + pSY161 (JPUB_020917) | Successfully produced Sal-1 when <i>E. coli</i> K207-3 was transformed with pSY161  | This study |
| <i>E. coli</i> DH10B + pSY162 (JPUB_020919) | Successfully produced Mon-5 when <i>E. coli</i> K207-3 was transformed with pSY162  | This study |
| <i>E. coli</i> DH10B + pSY164 (JPUB_020921) | Successfully produced Sta-12 when <i>E. coli</i> K207-3 was transformed with pSY164 | This study |
| <i>E. coli</i> DH10B + pSY165 (JPUB_020923) | Successfully produced Rev-4 when <i>E. coli</i> K207-3 was transformed with pSY165  | This study |
| <i>E. coli</i> DH10B + pSY166 (JPUB_020925) | Successfully produced Spl-3 when <i>E. coli</i> K207-3 was transformed with pSY166  | This study |
| <i>E. coli</i> DH10B + pEE1 (JPUB_020927)   | Successfully produced WT A162W when <i>E. coli</i> K207-3 was transformed with pEE1 | This study |

|                                               |                                                                                                 |            |
|-----------------------------------------------|-------------------------------------------------------------------------------------------------|------------|
| <i>E. coli</i> DH10B + pEE2<br>(JPUB_020930)  | Successfully produced Epo-4 A162W when <i>E. coli</i> K207-3 was transformed with pEE2          | This study |
| <i>E. coli</i> DH10B + pEE3<br>(JPUB_020932)  | Successfully produced Rev-4 A162W when <i>E. coli</i> K207-3 was transformed with pEE3          | This study |
| <i>E. coli</i> DH10B + pLK54<br>(JPUB_020893) | Successfully produced MatB T207G/M306I when <i>E. coli</i> BL21(DE3) was transformed with pLK54 | 18         |

]

**Table S3.** Polyketide production by Epo-4 relative to WT.

| Extender substrates      | Peak area (WT)  | Peak area (Epo-4) , Natural substrates = Malonyl-CoA/Methylmalonyl-CoA | Production levels (relative to WT) |
|--------------------------|-----------------|------------------------------------------------------------------------|------------------------------------|
| Malonyl-CoA              | n.d.            | 171127/182787                                                          | -                                  |
| Methylmalonyl-CoA        | 2304095/2239351 | 1471130/1316948                                                        | 0.61                               |
| Ethylmalonyl-CoA         | 1865023/2026810 | 1345308/1437711                                                        | 0.72                               |
| Propylmalonyl-CoA        | 79814/83584     | 1756713/1825373                                                        | 21.92                              |
| Isopropylmalonyl-CoA     | n.d.            | n.d.                                                                   | -                                  |
| Propargylmalonyl-CoA     | 692500/726575   | 1097955/1122949                                                        | 1.57                               |
| Allylmalonyl-CoA         | 1536761/1955323 | 4222400/4356072                                                        | 2.46                               |
| Butylmalonyl-CoA         | 285677/318832   | 3655044/3816523                                                        | 12.36                              |
| Isobutylmalonyl-CoA      | n.d.            | 9758/10593                                                             | -                                  |
| Pentylmalonyl-CoA        | 21927/20665     | 169249/169653                                                          | 7.96                               |
| Isopentylmalonyl-CoA     | n.d.            | 16278/17311                                                            | -                                  |
| 2-Methylbutylmalonyl-CoA | n.d.            | n.d.                                                                   | -                                  |
| Hexylmalonyl-CoA         | 27431/23733     | 12436/12502                                                            | 0.49                               |
| Phenylmalonyl-CoA        | n.d.            | n.d.                                                                   | -                                  |

Mass counts <5000 were shown as n.d. These experiments were repeated at least twice. The results of the first measurements were shown in left and the results of second measurements were shown in right. Relative production levels were calculated using averaged peak area.

**Table S4.** Polyketide production by Mon-5 relative to WT.

| <b>Extender substrates</b> | <b>Peak area (WT)</b> | <b>Peak area (Mon-5), Natural substrates = Methylmalonyl-CoA/Ethylmalonyl-CoA</b> | <b>Production levels (relative to WT)</b> |
|----------------------------|-----------------------|-----------------------------------------------------------------------------------|-------------------------------------------|
| Malonyl-CoA                | n.d.                  | n.d.                                                                              | -                                         |
| Methylmalonyl-CoA          | 2304095/2239351       | 478154/447721                                                                     | 0.20                                      |
| Ethylmalonyl-CoA           | 1865023/2026810       | 50451/46250                                                                       | <0.1                                      |
| Propylmalonyl-CoA          | 79814/83584           | 110575/104542                                                                     | 1.32                                      |
| Isopropylmalonyl-CoA       | n.d.                  | n.d.                                                                              | -                                         |
| Propargylmalonyl-CoA       | 692500/726575         | 29510/31174                                                                       | <0.1                                      |
| Allylmalonyl-CoA           | 1536761/1955323       | 121033/101002                                                                     | <0.1                                      |
| Butylmalonyl-CoA           | 285677/318832         | 33268/30961                                                                       | 1.06                                      |
| Isobutylmalonyl-CoA        | n.d.                  | 12280/12019                                                                       | -                                         |
| Pentylmalonyl-CoA          | 21927/20665           | 381319/344181                                                                     | 17.03                                     |
| Isopentylmalonyl-CoA       | n.d.                  | 187593/176570                                                                     | -                                         |
| 2-Methylbutylmalonyl-CoA   | n.d.                  | 24302/25601                                                                       | -                                         |
| Hexylmalonyl-CoA           | 27431/23733           | 229580/208193                                                                     | 8.56                                      |
| Phenylmalonyl-CoA          | n.d.                  | 50834/44713                                                                       | -                                         |

Mass counts <5000 were shown as n.d. These experiments were repeated at least twice. The results of the first measurements were shown in left and the results of second measurements were shown in right. Relative production levels were calculated using averaged peak area.

**Table S5.** Polyketide production by Nid-5 relative to WT.

| Extender substrates      | Peak area (WT)  | Peak area (Nid-5) , Natural substrate = Ethylmalonyl-CoA | Production levels (relative to WT) |
|--------------------------|-----------------|----------------------------------------------------------|------------------------------------|
| Malonyl-CoA              | n.d.            | n.d.                                                     | -                                  |
| Methylmalonyl-CoA        | 2304095/2239351 | n.d.                                                     | -                                  |
| Ethylmalonyl-CoA         | 1865023/2026810 | 46761/47250                                              | <0.1                               |
| Propylmalonyl-CoA        | 79814/83584     | 294360/306481                                            | 3.68                               |
| Isopropylmalonyl-CoA     | n.d.            | n.d.                                                     | -                                  |
| Propargylmalonyl-CoA     | 692500/726575   | 56174/46441                                              | <0.1                               |
| Allylmalonyl-CoA         | 1536761/1955323 | 131064/215105                                            | 0.10                               |
| Butylmalonyl-CoA         | 285677/318832   | 1192008/1221287                                          | 3.99                               |
| Isobutylmalonyl-CoA      | n.d.            | 37026/35593                                              | -                                  |
| Pentylmalonyl-CoA        | 21927/20665     | 1856123/2454148                                          | 101.20                             |
| Isopentylmalonyl-CoA     | n.d.            | 1204497/1149175                                          | -                                  |
| 2-Methylbutylmalonyl-CoA | n.d.            | 97527/101511                                             | -                                  |
| Hexylmalonyl-CoA         | 27431/23733     | 1459940/1629903                                          | 56.16                              |
| Phenylmalonyl-CoA        | n.d.            | 47539/52863                                              | -                                  |

Mass counts <5000 were shown as n.d. These experiments were repeated at least twice. The results of the first measurements were shown in left and the results of second measurements were shown in right. Relative production levels were calculated using averaged peak area.



**Table S6.** Polyketide production by Rev-4 relative to WT.

| <b>Extender substrates</b> | <b>Peak area (WT)</b> | <b>Peak area (Rev-4) , Natural substrates = Butylmalonyl-CoA/Hexylmalonyl-CoA etc.</b> | <b>Production levels (relative to WT)</b> |
|----------------------------|-----------------------|----------------------------------------------------------------------------------------|-------------------------------------------|
| Malonyl-CoA                | n.d.                  | n.d.                                                                                   | -                                         |
| Methylmalonyl-CoA          | 2304095/2239351       | 164132/154758                                                                          | <0.1                                      |
| Ethylmalonyl-CoA           | 1865023/2026810       | 81413/79781                                                                            | <0.1                                      |
| Propylmalonyl-CoA          | 79814/83584           | 181361/192556                                                                          | 2.29                                      |
| Isopropylmalonyl-CoA       | n.d.                  | n.d.                                                                                   | -                                         |
| Propargylmalonyl-CoA       | 692500/726575         | 5606/22348                                                                             | <0.1                                      |
| Allylmalonyl-CoA           | 1536761/1955323       | 132330/129377                                                                          | <0.1                                      |
| Butylmalonyl-CoA           | 285677/318832         | 431294/444164                                                                          | 1.45                                      |
| Isobutylmalonyl-CoA        | n.d.                  | 20251/20067                                                                            | -                                         |
| Pentylmalonyl-CoA          | 21927/20665           | 648949/693084                                                                          | 31.50                                     |
| Isopentylmalonyl-CoA       | n.d.                  | 376906/371944                                                                          | -                                         |
| 2-Methylbutylmalonyl-CoA   | n.d.                  | 36727/36584                                                                            | -                                         |
| Hexylmalonyl-CoA           | 27431/23733           | 1876211/899567                                                                         | 54.25                                     |
| Phenylmalonyl-CoA          | n.d.                  | n.d.                                                                                   | -                                         |

Mass counts <5000 were shown as n.d. These experiments were repeated at least twice. The results of the first measurements were shown in left and the results of second measurements were shown in right. Relative production levels were calculated using averaged peak area.

**Table S7.** Polyketide production by Div-4 relative to WT.

| <b>Extender substrates</b> | <b>Peak area (WT)</b> | <b>Peak area (Div-4) , Natural substrate = Ethylmalonyl-CoA</b> | <b>Production levels (relative to WT)</b> |
|----------------------------|-----------------------|-----------------------------------------------------------------|-------------------------------------------|
| Malonyl-CoA                | n.d.                  | n.d.                                                            | -                                         |
| Methylmalonyl-CoA          | 2304095/2239351       | 17027/23813                                                     | <0.1                                      |
| Ethylmalonyl-CoA           | 1865023/2026810       | 126044/77745                                                    | <0.1                                      |
| Propylmalonyl-CoA          | 79814/83584           | 1455398/1810511                                                 | 19.99                                     |
| Isopropylmalonyl-CoA       | n.d.                  | n.d.                                                            | -                                         |
| Propargylmalonyl-CoA       | 692500/726575         | 247947/262075                                                   | 0.36                                      |
| Allylmalonyl-CoA           | 1536761/1955323       | 542400/138016                                                   | 0.19                                      |
| Butylmalonyl-CoA           | 285677/318832         | 270677/279028                                                   | 0.91                                      |
| Isobutylmalonyl-CoA        | n.d.                  | 60440/55669                                                     | -                                         |
| Pentylmalonyl-CoA          | 21927/20665           | 10990/8936                                                      | 0.47                                      |
| Isopentylmalonyl-CoA       | n.d.                  | n.d.                                                            | -                                         |
| 2-Methylbutylmalonyl-CoA   | n.d.                  | n.d.                                                            | -                                         |
| Hexylmalonyl-CoA           | 27431/23733           | 3847/7393                                                       | 0.22                                      |
| Phenylmalonyl-CoA          | n.d.                  | n.d.                                                            | -                                         |

Mass counts < 5000 were shown as n.d. These experiments were repeated at least twice. The results of the first measurements were shown in left and the results of second measurements were shown in right. Relative production levels were calculated using averaged peak area.

**Table S8.** Polyketide production by Ans-8 relative to WT.

| Extender substrates      | Peak area (WT)  | Peak area (Ans-8) , Natural substrate = Isobutylmalonyl-CoA | Production levels (relative to WT) |
|--------------------------|-----------------|-------------------------------------------------------------|------------------------------------|
| Malonyl-CoA              | n.d.            | n.d.                                                        | -                                  |
| Methylmalonyl-CoA        | 2304095/2239351 | 336884/366112                                               | 0.15                               |
| Ethylmalonyl-CoA         | 1865023/2026810 | 1146284/1173116                                             | 0.60                               |
| Propylmalonyl-CoA        | 79814/83584     | 627106/655794                                               | 7.85                               |
| Isopropylmalonyl-CoA     | n.d.            | n.d.                                                        | -                                  |
| Propargylmalonyl-CoA     | 692500/726575   | 2240/26242                                                  | <0.1                               |
| Allylmalonyl-CoA         | 1536761/1955323 | 22187/56360                                                 | <0.1                               |
| Butylmalonyl-CoA         | 285677/318832   | 854202/913005                                               | 2.92                               |
| Isobutylmalonyl-CoA      | n.d.            | 45779/45399                                                 | -                                  |
| Pentylmalonyl-CoA        | 21927/20665     | 2646684/2514213                                             | 121.17                             |
| Isopentylmalonyl-CoA     | n.d.            | 760387/826935                                               | -                                  |
| 2-Methylbutylmalonyl-CoA | n.d.            | 88500/80608                                                 | -                                  |
| Hexylmalonyl-CoA         | 27431/23733     | 3032390/2891943                                             | 115.79                             |
| Phenylmalonyl-CoA        | n.d.            | 64633/66129                                                 | -                                  |

Mass counts <5000 were shown as n.d. These experiments were repeated at least twice. The results of the first measurements were shown in left and the results of second measurements were shown in right. Relative production levels were calculated using averaged peak area.

**Table S9.** Polyketide production by San-13 relative to WT.

| Extender substrates      | Peak area (WT)  | Peak area (San-13) , Natural substrate = 3-oxobutylmalonyl-CoA | Production levels (relative to WT) |
|--------------------------|-----------------|----------------------------------------------------------------|------------------------------------|
| Malonyl-CoA              | n.d.            | n.d.                                                           | -                                  |
| Methylmalonyl-CoA        | 2304095/2239351 | 5819/5342                                                      | <0.1                               |
| Ethylmalonyl-CoA         | 1865023/2026810 | 104510/103818                                                  | <0.1                               |
| Propylmalonyl-CoA        | 79814/83584     | 360647/362517                                                  | 4.43                               |
| Isopropylmalonyl-CoA     | n.d.            | n.d.                                                           | -                                  |
| Propargylmalonyl-CoA     | 692500/726575   | 26061/23209                                                    | <0.1                               |
| Allylmalonyl-CoA         | 1536761/1955323 | 248801/282425                                                  | 0.15                               |
| Butylmalonyl-CoA         | 285677/318832   | 463660/466082                                                  | 1.54                               |
| Isobutylmalonyl-CoA      | n.d.            | 62303/63295                                                    | -                                  |
| Pentylmalonyl-CoA        | 21927/20665     | 411994/342234                                                  | 17.70                              |
| Isopentylmalonyl-CoA     | n.d.            | 387413/404778                                                  | -                                  |
| 2-Methylbutylmalonyl-CoA | n.d.            | 62434/62061                                                    | -                                  |
| Hexylmalonyl-CoA         | 27431/23733     | 118778/121966                                                  | 4.71                               |
| Phenylmalonyl-CoA        | -               | -                                                              | -                                  |

Mass counts <5000 were shown as n.d. These experiments were repeated at least twice. The results of the first measurements were shown in left and the results of second measurements were shown in right. Relative production levels were calculated using averaged peak area.

**Table S10.** Polyketide production by Leu-2 relative to WT.

| Extender substrates      | Peak area (WT)  | Peak area (Leu-2) , Natural substrate = 1-hydroxyisopentylmalonyl-CoA | Production levels (relative to WT) |
|--------------------------|-----------------|-----------------------------------------------------------------------|------------------------------------|
| Malonyl-CoA              | n.d.            | n.d.                                                                  | -                                  |
| Methylmalonyl-CoA        | 2304095/2239351 | n.d.                                                                  | -                                  |
| Ethylmalonyl-CoA         | 1865023/2026810 | 87276/87517                                                           | <0.1                               |
| Propylmalonyl-CoA        | 79814/83584     | 338600/639709                                                         | 5.99                               |
| Isopropylmalonyl-CoA     | n.d.            | n.d.                                                                  | -                                  |
| Propargylmalonyl-CoA     | 692500/726575   | 48604/48556                                                           | <0.1                               |
| Allylmalonyl-CoA         | 1536761/1955323 | 389718/369816                                                         | 0.22                               |
| Butylmalonyl-CoA         | 285677/318832   | 1031688/1040048                                                       | 3.43                               |
| Isobutylmalonyl-CoA      | n.d.            | 81870/92879                                                           | -                                  |
| Pentylmalonyl-CoA        | 21927/20665     | 845451/800461                                                         | 38.64                              |
| Isopentylmalonyl-CoA     | n.d.            | 941081/996046                                                         | -                                  |
| 2-Methylbutylmalonyl-CoA | n.d.            | 114278/127554                                                         | -                                  |
| Hexylmalonyl-CoA         | 27431/23733     | 384898/402621                                                         | 15.39                              |
| Phenylmalonyl-CoA        | n.d.            | n.d.                                                                  | -                                  |

Mass counts <5000 were shown as n.d. These experiments were repeated at least twice. The results of the first measurements were shown in left and the results of second measurements were shown in right. Relative production levels were calculated using averaged peak area.

**Table S11.** Polyketide production by Div-6 relative to WT

| <b>Extender substrates</b> | <b>Peak area (WT)</b> | <b>Peak area (Div-6) , Natural substrate = Isobutenylmalonyl-CoA</b> | <b>Production levels (relative to WT)</b> |
|----------------------------|-----------------------|----------------------------------------------------------------------|-------------------------------------------|
| Malonyl-CoA                | n.d.                  | n.d.                                                                 | -                                         |
| Methylmalonyl-CoA          | 2304095/2239351       | n.d.                                                                 | -                                         |
| Ethylmalonyl-CoA           | 1865023/2026810       | n.d.                                                                 | -                                         |
| Propylmalonyl-CoA          | 79814/83584           | n.d.                                                                 | -                                         |
| Isopropylmalonyl-CoA       | n.d.                  | n.d.                                                                 | -                                         |
| Propargylmalonyl-CoA       | 692500/726575         | n.d.                                                                 | -                                         |
| Allylmalonyl-CoA           | 1536761/1955323       | n.d.                                                                 | -                                         |
| Butylmalonyl-CoA           | 285677/318832         | 7130/8126                                                            | <0.1                                      |
| Isobutylmalonyl-CoA        | n.d.                  | 73303/56791                                                          | -                                         |
| Pentylmalonyl-CoA          | 21927/20665           | 18373/17726                                                          | 0.85                                      |
| Isopentylmalonyl-CoA       | n.d.                  | 1599751/1250115                                                      | -                                         |
| 2-Methylbutylmalonyl-CoA   | n.d.                  | 267937/302102                                                        | -                                         |
| Hexylmalonyl-CoA           | 27431/23733           | 36387/32455                                                          | 1.35                                      |
| Phenylmalonyl-CoA          | n.d.                  | n.d.                                                                 | -                                         |

Mass counts <5000 were shown as n.d. These experiments were repeated at least twice. The results of the first measurements were shown in left and the results of second measurements were shown in right. Relative production levels were calculated using averaged peak area.

**Table S12.** Polyketide production by Sal-1 relative to WT.

| <b>Extender substrates</b> | <b>Peak area (WT)</b> | <b>Peak area (Sal-1) , Natural substrate = 2-chloroethylmalonyl-CoA</b> | <b>Production levels (relative to WT)</b> |
|----------------------------|-----------------------|-------------------------------------------------------------------------|-------------------------------------------|
| Malonyl-CoA                | n.d.                  | n.d.                                                                    | -                                         |
| Methylmalonyl-CoA          | 2304095/2239351       | n.d.                                                                    | -                                         |
| Ethylmalonyl-CoA           | 1865023/2026810       | 19838/11216                                                             | <0.1                                      |
| Propylmalonyl-CoA          | 79814/83584           | 107821/114295                                                           | 1.36                                      |
| Isopropylmalonyl-CoA       | n.d.                  | n.d.                                                                    | -                                         |
| Propargylmalonyl-CoA       | 692500/726575         | 28550/34344                                                             | <0.1                                      |
| Allylmalonyl-CoA           | 1536761/1955323       | 102653/50940                                                            | <0.1                                      |
| Butylmalonyl-CoA           | 285677/318832         | 575432/566416                                                           | 1.89                                      |
| Isobutylmalonyl-CoA        | n.d.                  | 37001/19636                                                             | -                                         |
| Pentylmalonyl-CoA          | 21927/20665           | 1601468/1506859                                                         | 72.98                                     |
| Isopentylmalonyl-CoA       | n.d.                  | 329974/344156                                                           | -                                         |
| 2-Methylbutylmalonyl-CoA   | n.d.                  | 36176/37379                                                             | -                                         |
| Hexylmalonyl-CoA           | 27431/23733           | 267900/666300                                                           | 18.26                                     |
| Phenylmalonyl-CoA          | n.d.                  | n.d.                                                                    | -                                         |

Mass counts <5000 were shown as n.d. These experiments were repeated at least twice. The results of the first measurements were shown in left and the results of second measurements were shown in right. Relative production levels were calculated using averaged peak area.

**Table S13.** Polyketide production by Sta-12 relative to WT

| Extender substrates      | Peak area (WT)  | Peak area (Sta-12), , Natural substrates = Hexylmalonyl-CoA/Isoheptylmalonyl-CoA etc. | Production levels (relative to WT) |
|--------------------------|-----------------|---------------------------------------------------------------------------------------|------------------------------------|
| Malonyl-CoA              | n.d.            | n.d.                                                                                  | -                                  |
| Methylmalonyl-CoA        | 2304095/2239351 | n.d.                                                                                  | -                                  |
| Ethylmalonyl-CoA         | 1865023/2026810 | 4598/4568                                                                             | <0.1                               |
| Propylmalonyl-CoA        | 79814/83584     | 14018/13004                                                                           | 0.17                               |
| Isopropylmalonyl-CoA     | n.d.            | n.d.                                                                                  | -                                  |
| Propargylmalonyl-CoA     | 692500/726575   | n.d.                                                                                  | -                                  |
| Allylmalonyl-CoA         | 1536761/1955323 | n.d.                                                                                  | -                                  |
| Butylmalonyl-CoA         | 285677/318832   | 34735/10016                                                                           | <0.1                               |
| Isobutylmalonyl-CoA      | n.d.            | n.d.                                                                                  | -                                  |
| Pentylmalonyl-CoA        | 21927/20665     | 28105/32359                                                                           | 1.42                               |
| Isopentylmalonyl-CoA     | n.d.            | 101402/96617                                                                          | -                                  |
| 2-Methylbutylmalonyl-CoA | n.d.            | 12108/14369                                                                           | -                                  |
| Hexylmalonyl-CoA         | 27431/23733     | 12040/39889                                                                           | 1.01                               |
| Phenylmalonyl-CoA        | n.d.            | n.d.                                                                                  | -                                  |

Mass counts <5000 were shown as n.d. These experiments were repeated at least twice. The results of the first measurements were shown in left and the results of second measurements were shown in right. Relative production levels were calculated using averaged peak area.



**Table S14.** Polyketide production by Spl-3 relative to WT.

| <b>Extender substrates</b> | <b>Peak area (WT)</b> | <b>Peak area (Spl-3), Natural substrates = Benzylmalonyl-CoA</b> | <b>Production levels (relative to WT)</b> |
|----------------------------|-----------------------|------------------------------------------------------------------|-------------------------------------------|
| Malonyl-CoA                | n.d.                  | n.d.                                                             | -                                         |
| Methylmalonyl-CoA          | 2304095/2239351       | n.d.                                                             | -                                         |
| Ethylmalonyl-CoA           | 1865023/2026810       | n.d.                                                             | -                                         |
| Propylmalonyl-CoA          | 79814/83584           | 19711/15117                                                      | 0.21                                      |
| Isopropylmalonyl-CoA       | n.d.                  | n.d.                                                             | -                                         |
| Propargylmalonyl-CoA       | 692500/726575         | n.d.                                                             | -                                         |
| Allylmalonyl-CoA           | 1536761/1955323       | n.d.                                                             | -                                         |
| Butylmalonyl-CoA           | 285677/318832         | 31791/27497                                                      | <0.1                                      |
| Isobutylmalonyl-CoA        | n.d.                  | n.d.                                                             | -                                         |
| Pentylmalonyl-CoA          | 21927/20665           | 25029/22488                                                      | 1.12                                      |
| Isopentylmalonyl-CoA       | n.d.                  | 20805/17082                                                      | -                                         |
| 2-Methylbutylmalonyl-CoA   | n.d.                  | n.d.                                                             | -                                         |
| Hexylmalonyl-CoA           | 27431/23733           | n.d.                                                             | -                                         |
| Phenylmalonyl-CoA          | n.d.                  | n.d.                                                             | -                                         |

Mass counts <5000 were shown as n.d. These experiments were repeated at least twice. The results of the first measurements were shown in left and the results of second measurements were shown in right. Relative production levels were calculated using averaged peak area.

**Table S15.** Amino acid sequences that are predicted to form AT active sites.

| <b>ATs</b>            | <b><math>\beta</math>1-<math>\alpha</math>1</b> | <b><math>\alpha</math>4</b> | <b><math>\beta</math>2-<math>\alpha</math>5</b> | <b><math>\beta</math>6-<math>\alpha</math>9</b> |
|-----------------------|-------------------------------------------------|-----------------------------|-------------------------------------------------|-------------------------------------------------|
| Erythromycin AT6 (WT) | GQGA                                            | RVDVVQP                     | GHSQGEI                                         | TLPVDYASH                                       |
| Epothilone AT4        | GQGA                                            | QTAFTQP                     | GHSAGEL                                         | RLHVSHASH                                       |
| Monensin AT5          | GQGG                                            | RIDVVQP                     | GHSQGEI                                         | AVASDVAGH                                       |
| Niddamycin AT5        | GQGS                                            | RVDVVQP                     | GHSQGEI                                         | IPGVDTAGH                                       |
| Reveromycin AT4       | GQGS                                            | RIDVYHP                     | GHSQGEV                                         | RILGMAASH                                       |
| Divergolide AT4       | GQGS                                            | RIEILQP                     | GHSQGEV                                         | VVGSTVASH                                       |
| Ansalactam AT8        | GQGS                                            | DLDVVQP                     | GHSQGEI                                         | IHGANAAGH                                       |
| Sangliferin AT13      | GHGA                                            | RVDVVQP                     | GHSQGEI                                         | VRQIVGAGH                                       |
| Leupyrrin AT2         | GFGS                                            | DLSYAQP                     | GHSLGEC                                         | KLDVRRAAH                                       |
| Divergolide AT6       | GQGS                                            | LIEVVQP                     | GHSQGEI                                         | IVGSSVASH                                       |
| Salinosporamide AT1   | GGGT                                            | ATDIQQP                     | GHSIGEV                                         | AVRVDRPGH                                       |
| Stambomycin AT12      | GQGS                                            | RAEVIQP                     | GHSQGEI                                         | KLRIKGAH                                        |
| Splenocin AT3         | GGGT                                            | GSTAAFV                     | GHSLGEY                                         | RLRMPAAAH                                       |

### 3. Supplementary methods

**Acyl-CoA detection.** Acyl-CoAs were analyzed as previously described<sup>19</sup>. Briefly, acyl CoA compounds were analyzed via LC-MS (1290 Infinity II UHPLC system and 6545 quadrupole TOF-MS; Agilent technologies) on a SeQuant ZIC-HILIC column (150 mm length, 2.1 mm internal diameter, 5  $\mu\text{m}$  particle size; Sigma-Millipore) at 35 °C. The mobile phase was composed of 10 mM  $\text{NH}_4\text{OAc}$  + 0.8%  $\text{NH}_4\text{OH}$  in 54.9% acetonitrile in water. Sample injection volume of 1  $\mu\text{L}$  was used throughout. Electrospray ionization conditions for the MS were as follows: Negative ion mode, drying gas temperature = 300 °C, drying gas flow rate = 10 L/min, sheath gas temperature = 350 °C, sheath gas flow rate = 12 L/min, nebulizer = 20 lb/in<sup>2</sup>, VCap = 3500 V, nozzle voltage = 2000 V, fragmentor = 100 V, skimmer = 50 V, and OCT 1 RF Vpp = 300 V. A mass range of 70-1100  $m/z$  was used. We also used the following reported method to analyze acyl-CoA production<sup>1</sup>. Briefly, acyl CoA compounds were analyzed via LC-MS (1290 Infinity II UHPLC system and 6545 quadrupole TOF-MS; Agilent technologies) on a Poroshell 120 HILIC-Z (100 mm length, 2.1 mm internal diameter, 2.7  $\mu\text{m}$  particle size; Agilent technologies) at 30 °C. The mobile phase (A) was composed of 10 mM  $\text{NH}_4\text{OAc}$  + 0.2%  $\text{NH}_4\text{OH}$  + 5  $\mu\text{M}$  mendronic acid in water. The mobile phase (B) was composed of 10 mM  $\text{NH}_4\text{OAc}$  + 0.2%  $\text{NH}_4\text{OH}$  + 5  $\mu\text{M}$  mendronic acid in 90% acetonitrile in water. Sample injection volume of 1  $\mu\text{L}$  was used throughout. Electrospray ionization conditions for the MS were as follows: Negative ion mode, drying gas temperature = 300 °C, drying gas flow rate = 10 L/min, sheath gas temperature = 350 °C, sheath gas flow rate = 12 L/min, nebulizer = 20 lb/in<sup>2</sup>, VCap = 3500 V, nozzle voltage = 2000 V, fragmentor = 100 V, skimmer = 50 V, and OCT 1 RF Vpp = 300 V. A mass range of 70-1100  $m/z$  was used.

**Polyketide detection.** LC separation of all polyketides was conducted at 50°C with a Phenomenex Kinetex XB-C18 column (100 mm length, 2.1 mm internal diameter, 2.6  $\mu\text{m}$  particle size) using an Agilent Technologies 1260 high performance liquid chromatography system. The mobile phase was composed of 0.1% formic acid in LC-MS grade water (solvent A) and 0.1% formic acid in LC-MS grade acetonitrile (solvent B). Polyketide products were separated using the following gradient: 15% to 100% B for 3.96 min, held at 100% B for 1.5 min, 100% to 15% B for 0.1 min, held at 15% B for 2.86 min. A flow rate of 0.31 mL/min was used until 5.46 min, increased to 0.45 mL/min in 0.1 min, and held at 0.45 mL/min for 2.86 min. The total LC run time was 8.42 min. The LC system was coupled to either an Agilent 6210 time-of-flight mass spectrometer (TOF-MS) system or a 6520 quadrupole TOF-MS (QTOF-MS) system. Electrospray ionization (ESI) was used to facilitate the transfer of polyketide productions from the LC to the MS system. Nitrogen gas was used as both the nebulizing and drying gas to facilitate the production of gas-phase ions. The drying and nebulizing gases were set to 10 L/min and 30 lb/in<sup>2</sup>, respectively, and a drying gas temperature of 330°C was used throughout. ESI was conducted in the positive-ion mode for TKLs with a capillary voltage of 4 kV. The Fragmentor, skimmer and Oct 1 RF Vpp voltages were set to 140 V, 50 V, and 250 V, respectively. The acquisition rate was set to 0.86 spectra/s.

## 4. Supplementary references

- (1) Amer, B.; Kakumanu, R.; Baidoo, E.E.K. HILIC-MS analysis of central carbon metabolisms in Gram negative bacteria. <https://dx.doi.org/10.17504/protocols.io.4r3l2opzxv1y/v1>
- (2) Yadav, G.; Gokhale, R. S.; Mohanty, D. Computational approach for prediction of domain organization and substrate specificity of modular polyketide synthases. *J Mol Biol* **2003**, *328* (2), 335-363.
- (3) Minowa, Y.; Araki, M.; Kanehisa, M. Comprehensive analysis of distinctive polyketide and nonribosomal peptide structural motifs encoded in microbial genomes. *J Mol Biol* **2007**, *368* (5), 1500-1517.
- (4) Yuzawa, S.; Deng, K.; Wang, G.; Baidoo, E. E.; Northen, T. R.; Adams, P. D.; Katz, L.; Keasling, J. D. Comprehensive in Vitro Analysis of Acyltransferase Domain Exchanges in Modular Polyketide Synthases and Its Application for Short-Chain Ketone Production. *ACS Synth Biol* **2017**, *6* (1), 139-147.
- (5) Kakavas, S. J.; Katz, L.; Stassi, D. Identification and characterization of the niddamycin polyketide synthase genes from *Streptomyces caelestis*. *J Bacteriol* **1997**, *179* (23), 7515-7522.
- (6) Migita, A.; Watanabe, M.; Hirose, Y.; Watanabe, K.; Tokiwano, T.; Kinashi, H.; Oikawa, H. Identification of a gene cluster of polyether antibiotic lasalocid from *Streptomyces lasaliensis*. *Biosci Biotechnol Biochem* **2009**, *73* (1), 169-176.
- (7) Mo, S.; Kim, D. H.; Lee, J. H.; Park, J. W.; Basnet, D. B.; Ban, Y. H.; Yoo, Y. J.; Chen, S. W.; Park, S. R.; Choi, E. A.; et al. Biosynthesis of the allylmalonyl-CoA extender unit for the FK506 polyketide synthase proceeds through a dedicated polyketide synthase and facilitates the mutasynthesis of analogues. *J Am Chem Soc* **2011**, *133* (4), 976-985.
- (8) Buntin, K.; Irschik, H.; Weissman, K. J.; Luxenburger, E.; Blöcker, H.; Müller, R. Biosynthesis of thuggacins in myxobacteria: comparative cluster analysis reveals basis for natural product structural diversity. *Chem Biol* **2010**, *17* (4), 342-356.
- (9) Wilson, M. C.; Nam, S. J.; Gulder, T. A.; Kauffman, C. A.; Jensen, P. R.; Fenical, W.; Moore, B. S. Structure and biosynthesis of the marine streptomyccete ansamycin ansalactam A and its distinctive branched chain polyketide extender unit. *J Am Chem Soc* **2011**, *133* (6), 1971-1977.
- (10) Qu, X.; Jiang, N.; Xu, F.; Shao, L.; Tang, G.; Wilkinson, B.; Liu, W. Cloning, sequencing and characterization of the biosynthetic gene cluster of sangliferin A, a potent cyclophilin inhibitor. *Mol Biosyst* **2011**, *7* (3), 852-861.
- (11) Kopp, M.; Irschik, H.; Gemperlein, K.; Buntin, K.; Meiser, P.; Weissman, K. J.; Bode, H. B.; Müller, R. Insights into the complex biosynthesis of the leupyrrins in *Sorangium cellulosum* So ce690. *Mol Biosyst* **2011**, *7* (5), 1549-1563.
- (12) Li, S. R.; Zhao, G. S.; Sun, M. W.; He, H. G.; Wang, H. X.; Li, Y. Y.; Lu, C. H.; Shen, Y. M. Identification and characterization of the biosynthetic gene cluster of divergolides from *Streptomyces* sp. W112. *Gene* **2014**, *544* (1), 93-99.
- (13) Eustáquio, A. S.; McGlinchey, R. P.; Liu, Y.; Hazzard, C.; Beer, L. L.; Florova, G.; Alhamadsheh, M. M.; Lechner, A.; Kale, A. J.; Kobayashi, Y.; et al. Biosynthesis of the salinosporamide A polyketide synthase substrate chloroethylmalonyl-coenzyme A from S-adenosyl-L-methionine. *Proc Natl Acad Sci U S A* **2009**, *106* (30), 12295-12300.

- (14) Oliynyk, M.; Stark, C. B. W.; Bhatt, A.; Jones, M. A.; Hughes-Thomas, Z. A.; Wilkinson, C.; Oliynyk, Z.; Demydchuk, Y.; Staunton, J.; Leadlay, P. F. Analysis of the biosynthetic gene cluster for the polyether antibiotic monensin in *Streptomyces cinnamonensis* and evidence for the role of monB and monC genes in oxidative cyclization. *Molecular Microbiology* **2003**, *49* (5), 1179-1190.
- (15) Laureti, L.; Song, L.; Huang, S.; Corre, C.; Leblond, P.; Challis, G. L.; Aigle, B. Identification of a bioactive 51-membered macrolide complex by activation of a silent polyketide synthase in *Streptomyces ambofaciens*. *Proc Natl Acad Sci U S A* **2011**, *108* (15), 6258-6263.
- (16) Takahashi, S.; Toyoda, A.; Sekiyama, Y.; Takagi, H.; Nogawa, T.; Uramoto, M.; Suzuki, R.; Koshino, H.; Kumano, T.; Panthee, S.; et al. Reveromycin A biosynthesis uses RevG and RevJ for stereospecific spiroacetal formation. *Nat Chem Biol* **2011**, *7* (7), 461-468.
- (17) Chang, C.; Huang, R.; Yan, Y.; Ma, H.; Dai, Z.; Zhang, B.; Deng, Z.; Liu, W.; Qu, X. Uncovering the formation and selection of benzylmalonyl-CoA from the biosynthesis of splenocin and enterocin reveals a versatile way to introduce amino acids into polyketide carbon scaffolds. *J Am Chem Soc* **2015**, *137* (12), 4183-4190.
- (18) Koryakina, I.; McArthur, J.; Randall, S.; Draelos, M. M.; Musiol, E. M.; Muddiman, D. C.; Weber, T.; Williams, G. J. Poly specific trans-acyltransferase machinery revealed via engineered acyl-CoA synthetases. *ACS Chem Biol* **2013**, *8* (1), 200-208.
- (19) (a) Baidoo, E. E. K.; Wang, G.; Joshua, C. J.; Benites, V. T.; Keasling, J. D. Liquid Chromatography and Mass Spectrometry Analysis of Isoprenoid Intermediates in *Escherichia coli*. *Methods Mol Biol* **2019**, *1859*, 209-224. (b) Kim, J.; Baidoo, E. E. K.; Amer, B.; Mukhopadhyay, A.; Adams, P. D.; Simmons, B. A.; Lee, T. S. Engineering *Saccharomyces cerevisiae* for isoprenol production. *Metab Eng* **2021**, *64*, 154-166.
